# Supplementary material
Source: PubMed Central journal article supplement (PMC9115617)
Supplement: jama-e225368-s002.pdf [file jama-e225368-s002.pdf]

## Supplemental Online Content

Lv J, Wong MG, Hladunewich MA, et al; for the TESTING Study Group. Effect of Oral Methylprednisolone on Decline in Kidney Function or Kidney Failure in Patients With IgA Nephropathy. *JAMA*. Published online May 17, 2022.  
doi:10.1001/jama.2022.5368

**Supplement 2. eTable 1.** TESTING Timeline

**eTable 2.** Inclusion and Exclusion Criteria

**eTable 3.** Comparison of Baseline Characteristics Between Participants Randomized to the Full-dose and Reduced-dose Protocols

**eTable 4.** Serious Adverse Events by Randomized Group Overall, and for the Full and Reduced Methylprednisolone Dosage Regimens

**eFigure 1.** Summary of sequence of Events of the TESTING Trial

**eFigure 2.** Graphical Comparison Between Fixed Hazard Ratio and Time-Varying Hazard Ratio Using Kolmogorov-type Supremum Test

**eFigure 3.** Proteinuria and eGFR Reduction by Randomized Group Over Time

This supplemental material has been provided by the authors to give readers additional information about their work.

**eTable 1 - TESTING Timeline**

| Date                        | Name of document / Event          | Brief summary of changes / notes                                                                                                                                                                                                                                                                                                                 |
|-----------------------------|-----------------------------------|--------------------------------------------------------------------------------------------------------------------------------------------------------------------------------------------------------------------------------------------------------------------------------------------------------------------------------------------------|
| 16 June 2011                | TESTING Protocol V1.0             | <ul style="list-style-type: none"> <li>▪ Sample size – 1,300</li> </ul>                                                                                                                                                                                                                                                                          |
| 7 December 2011             | TESTING Protocol V2.0 Amendment 1 | <ul style="list-style-type: none"> <li>▪ Changes to Steering Committee membership</li> <li>▪ Inclusion of placebo</li> <li>▪ Addition of Hong Kong</li> <li>▪ Administrative clarifications and corrections</li> </ul>                                                                                                                           |
| 8 May 2012<br>6 August 2012 | Recruitment                       | <ul style="list-style-type: none"> <li>▪ First participant screened at Peking University First Hospital, China</li> <li>▪ First participant randomised at Peking University First Hospital, China</li> </ul>                                                                                                                                     |
| 3 December 2012             | TESTING Protocol V3.0 Amendment 2 | <ul style="list-style-type: none"> <li>▪ Changes to Steering Committee membership</li> <li>▪ Change to inclusion criteria</li> <li>▪ Updated CKD-EPI formula</li> <li>▪ Administrative clarifications and corrections</li> </ul>                                                                                                                 |
| 7 April 2014                | TESTING Protocol V4.0 Amendment 3 | <ul style="list-style-type: none"> <li>▪ Removal of the requirement for renal biopsy to be within the last 3 years</li> <li>▪ Inclusion criteria for eGFR revised from 20 to 90ml/min per 1.73m<sup>2</sup> (inclusive) to 20 to 120ml/min per 1.73m<sup>2</sup> (inclusive)</li> <li>▪ Administrative clarifications and corrections</li> </ul> |
| 13 May 2015                 | TESTING Protocol V5.0 Amendment 4 | <ul style="list-style-type: none"> <li>▪ Changes to Steering Committee membership and affiliations</li> <li>▪ Primary outcome modified from 50% eGFR reduction to 40% decrease in eGFR</li> <li>▪ Sample size modified to 750</li> <li>▪ Updated CKD-EPI formula</li> <li>▪ Administrative clarifications and corrections</li> </ul>             |

**eTable 1 - TESTING Timeline**

| Date                            | Name of document / Event          | Brief summary of changes / notes                                                                                                                                                                                                                                                                                                                                                                                                                                                                                                                                                       |
|---------------------------------|-----------------------------------|----------------------------------------------------------------------------------------------------------------------------------------------------------------------------------------------------------------------------------------------------------------------------------------------------------------------------------------------------------------------------------------------------------------------------------------------------------------------------------------------------------------------------------------------------------------------------------------|
| 6 November 2015                 | DSMB Meeting                      | <ul style="list-style-type: none"> <li>▪ DSMB meeting immediately followed by a letter recommending that the trial should not continue in its current form</li> </ul>                                                                                                                                                                                                                                                                                                                                                                                                                  |
| 12, 15, 20, 27<br>November 2015 | Steering Committee Meetings       | <ul style="list-style-type: none"> <li>▪ A series of Steering Committee meetings were held to discuss the DSMB letter</li> <li>▪ 15 Nov 2015 - Decision made to stop recruitment and wean participants off treatment</li> <li>▪ 20 Nov 2015 - Decision made to develop a low-dose protocol</li> <li>▪ 27 Nov 2015 - Discussions re low-dose protocol design</li> </ul>                                                                                                                                                                                                                 |
| 16 November 2015                | Letter to sites                   | <ul style="list-style-type: none"> <li>▪ A letter was sent to all sites informing them of the decision to cease recruitment and wean participants off randomised treatment</li> </ul>                                                                                                                                                                                                                                                                                                                                                                                                  |
| 25 December 2015                | Randomised treatment              | <ul style="list-style-type: none"> <li>▪ All participants weaned off randomised treatment</li> </ul>                                                                                                                                                                                                                                                                                                                                                                                                                                                                                   |
| 4 March 2016                    | SAP – Transitional analysis       | <ul style="list-style-type: none"> <li>▪ The SAP for the transitional analysis of full-dose participants finalised</li> </ul>                                                                                                                                                                                                                                                                                                                                                                                                                                                          |
| 22 May 2016                     | Presentation of results           | <ul style="list-style-type: none"> <li>▪ Presentation of the transitional analysis results at ERA/EDTA</li> </ul>                                                                                                                                                                                                                                                                                                                                                                                                                                                                      |
| 12 July 2016                    | TESTING Protocol V6.0 Amendment 5 | <ul style="list-style-type: none"> <li>▪ Duration of treatment changed from 6-8 months to 6-9 months</li> <li>▪ Changes to Steering Committee membership</li> <li>▪ Addition of an Executive Committee which is a subset of the Steering Committee</li> <li>▪ Additional secondary outcomes to allow comparison between the two cohorts</li> <li>▪ New section to describe the objectives for low dose cohort</li> <li>▪ Sample size amended to 500</li> <li>▪ Primary outcome target number updated</li> <li>▪ Adjustment to the treatment regimen for the low dose cohort</li> </ul> |

**eTable 1 - TESTING Timeline**

| Date              | Name of document / Event          | Brief summary of changes / notes                                                                                                                                                                                                                                                                                                                                                                                                                                                                                                                                                                                                                                                                       |
|-------------------|-----------------------------------|--------------------------------------------------------------------------------------------------------------------------------------------------------------------------------------------------------------------------------------------------------------------------------------------------------------------------------------------------------------------------------------------------------------------------------------------------------------------------------------------------------------------------------------------------------------------------------------------------------------------------------------------------------------------------------------------------------|
|                   |                                   | <ul style="list-style-type: none"> <li>▪ Addition of mandatory prophylactic treatment during the first 3 months after randomisation to reduce the risk of infection</li> <li>▪ eGFR range for inclusion amended from 20 to 120ml/min per 1.73m<sup>2</sup> (inclusive) to 30 to 120ml/min per 1.73m<sup>2</sup> (inclusive)</li> <li>▪ Trial procedures table updated including tracking vital status at all assessments</li> <li>▪ Addition of screening for latent tuberculosis (India participants only)</li> <li>▪ Additional text on the role of the DSMC with particular reference to the issues identified in November 2015</li> <li>▪ Administrative clarifications and corrections</li> </ul> |
| 19 September 2016 | TESTING Protocol V7.0 Amendment 6 | <ul style="list-style-type: none"> <li>▪ Clarification on the dose of prophylactic treatment</li> <li>▪ Inconsistencies amended in the trial procedures table</li> </ul>                                                                                                                                                                                                                                                                                                                                                                                                                                                                                                                               |
| 21 March 2017     | Recruitment                       | <ul style="list-style-type: none"> <li>▪ First participant randomised to the reduced-dose protocol at Peking University First Hospital, China</li> </ul>                                                                                                                                                                                                                                                                                                                                                                                                                                                                                                                                               |
| 9 May 2017        | Manuscript submitted to JAMA      | <ul style="list-style-type: none"> <li>▪ Transitional analysis manuscript submitted to JAMA</li> </ul>                                                                                                                                                                                                                                                                                                                                                                                                                                                                                                                                                                                                 |
| 14 August 2017    | Publication                       | <ul style="list-style-type: none"> <li>▪ Transitional analysis published in JAMA</li> </ul>                                                                                                                                                                                                                                                                                                                                                                                                                                                                                                                                                                                                            |
| 31 October 2018   | TESTING Protocol V8.0 Amendment 7 | <ul style="list-style-type: none"> <li>▪ Changes to Steering Committee membership</li> <li>▪ Administrative clarifications and corrections</li> </ul>                                                                                                                                                                                                                                                                                                                                                                                                                                                                                                                                                  |
| 27 November 2019  | Recruitment                       | <ul style="list-style-type: none"> <li>▪ Last participant randomised at<br/>The First Affiliated Hospital of Zhengzhou University, China</li> </ul>                                                                                                                                                                                                                                                                                                                                                                                                                                                                                                                                                    |
| 11 June 2021      | Follow-up                         | <ul style="list-style-type: none"> <li>▪ Last participant, last assessment</li> </ul>                                                                                                                                                                                                                                                                                                                                                                                                                                                                                                                                                                                                                  |
| 20 July 2021      | SAP – Final analysis              | <ul style="list-style-type: none"> <li>▪ SAP finalised</li> </ul>                                                                                                                                                                                                                                                                                                                                                                                                                                                                                                                                                                                                                                      |

**eTable 1 - TESTING Timeline**

| Date              | Name of document / Event | Brief summary of changes / notes                                                                                                               |
|-------------------|--------------------------|------------------------------------------------------------------------------------------------------------------------------------------------|
| 25/28 August 2021 | Unblinding               | <ul style="list-style-type: none"><li data-bbox="1014 260 1816 288">▪ Unblinding of results to the Executive and Steering Committees</li></ul> |
| 5 November 2021   | Presentation of results  | <ul style="list-style-type: none"><li data-bbox="1014 314 1420 343">▪ Final results presented at ASN</li></ul>                                 |

eTable 2: Inclusion and Exclusion Criteria

---

**Inclusion criteria**

1. IgA nephropathy proven on renal biopsy
2. Proteinuria:  $\geq 1.0\text{g/day}$  while receiving maximum tolerated dose of RAS blockade following the recommended treatment guidelines of each country where the trial is conducted
3. eGFR (on most recent test): 20 to 120ml/min per 1.73m<sup>2</sup> for participants in the full-dose arm; 30 to 120ml/min per 1.73m<sup>2</sup> for participants in the low-dose arm (inclusive)

**Exclusion criteria**

1. Indication for immunosuppressive therapy with corticosteroids, such as:
    - Minimal change renal disease with IgA deposits;
    - Crescents present in >50% of glomeruli on a renal biopsy within the last 12 months.
  2. Contraindication to immunosuppressive therapy with corticosteroids, including
    - Active infection, including HBV infection or clinical evidence of latent or active tuberculosis (nodules, cavities, tuberculoma etc.)
    - Malignancy within the last 5 years, excluding treated non-melanoma skin cancers (i.e. squamous or basal cell carcinoma)
    - Current or planned pregnancy or breastfeeding
    - Women of childbearing age who are not able or willing to use adequate contraception
  3. Systemic immunosuppressive therapy in the previous 1 year
  4. Malignant /uncontrolled hypertension (>160mmHg systolic or 110mmHg diastolic)
  5. Current unstable kidney function for other reasons, e.g. macrohaematuria induced acute kidney injury (past episodes are not a reason for exclusion)
  6. Age <14 years old
  7. Secondary IgA nephropathy: e.g. due to lupus, liver cirrhosis, IgA vasculitis
  8. Patients who are unlikely to comply with the study protocol in the view of the treating physician
-

eTable 3: Comparison of baseline characteristics between participants randomized to the full-dose and reduced-dose protocols

| Parameter                               | Full dose protocol           |                      | Reduced dose protocol        |                      | Testing for differences |
|-----------------------------------------|------------------------------|----------------------|------------------------------|----------------------|-------------------------|
|                                         | Methylprednisolone (N = 136) | Placebo (N = 126)    | Methylprednisolone (N = 121) | Placebo (N = 120)    |                         |
| Age                                     |                              |                      |                              |                      | 0.5596                  |
| N                                       | 136                          | 126                  | 121                          | 120                  |                         |
| Mean (SD)                               | 38.1 (11.54)                 | 38.1 (10.64)         | 36.7 (10.74)                 | 36.6 (10.81)         |                         |
| Median (IQR)                            | 36.5 (29.0; 46.5)            | 37.0 (28.0; 47.0)    | 35.0 (28.0; 44.0)            | 36.0 (28.5; 44.5)    |                         |
| Sex                                     |                              |                      |                              |                      | 0.6274                  |
| Female                                  | 50 (36.8%)                   | 46 (36.5%)           | 52 (43.0%)                   | 50 (41.7%)           |                         |
| Male                                    | 86 (63.2%)                   | 80 (63.5%)           | 69 (57.0%)                   | 70 (58.3%)           |                         |
| Race/ ethnic origin†                    |                              |                      |                              |                      | <.0001                  |
| Caucasian/European                      | 5 (3.7%)                     | 3 (2.4%)             | 8 (6.6%)                     | 9 (7.5%)             |                         |
| Chinese                                 | 130 (95.6%)                  | 121 (96.0%)          | 65 (53.7%)                   | 63 (52.5%)           |                         |
| South Asian                             | 0 (0.0%)                     | 0 (0.0%)             | 30 (24.8%)                   | 33 (27.5%)           |                         |
| South-East Asian                        | 1 (0.7%)                     | 2 (1.6%)             | 17 (14.0%)                   | 13 (10.8%)           |                         |
| Japanese                                | 0 (0.0%)                     | 0 (0.0%)             | 0 (0.0%)                     | 1 (0.8%)             |                         |
| Other Eastern Asian                     | 0 (0.0%)                     | 0 (0.0%)             | 1 (0.8%)                     | 0 (0.0%)             |                         |
| Mixed                                   | 0 (0.0%)                     | 0 (0.0%)             | 0 (0.0%)                     | 1 (0.8%)             |                         |
| BMI‡                                    |                              |                      |                              |                      | 0.0032                  |
| N                                       | 136                          | 126                  | 120                          | 118                  |                         |
| Mean (SD)                               | 24.37 (4.457)                | 24.28 (3.746)        | 25.38 (4.769)                | 26.11 (4.973)        |                         |
| Median (IQR)                            | 24.08 (21.39; 26.02)         | 23.69 (21.64; 26.50) | 24.77 (22.27; 27.69)         | 25.39 (23.14; 28.73) |                         |
| Smoking history                         |                              |                      |                              |                      | 0.1547                  |
| Non-smoker                              | 102 (75.0%)                  | 95 (75.4%)           | 97 (80.2%)                   | 101 (84.2%)          |                         |
| Previous smoker                         | 24 (17.6%)                   | 20 (15.9%)           | 15 (12.4%)                   | 7 (5.8%)             |                         |
| Current smoker                          | 10 (7.4%)                    | 11 (8.7%)            | 9 (7.4%)                     | 12 (10.0%)           |                         |
| Macrohematuria                          | 27 (19.9%)                   | 24 (19.0%)           | 15 (12.4%)                   | 14 (11.7%)           | 0.1550                  |
| Hypertension history                    | 71 (52.2%)                   | 52 (41.3%)           | 57 (47.1%)                   | 61 (50.8%)           | 0.2989                  |
| Tonsillectomy history                   | 1 (0.7%)                     | 1 (0.8%)             | 1 (0.8%)                     | 0 (0.0%)             | 0.8122                  |
| Past systematic corticosteroids therapy | 5 (3.7%)                     | 3 (2.4%)             | 13 (10.7%)                   | 7 (5.8%)             | 0.0229                  |
| Past other immunosuppressant therapy    | 8 (5.9%)                     | 6 (4.8%)             | 9 (7.4%)                     | 6 (5.0%)             | 0.8038                  |
| Family history of IgA nephropathy       | 2 (1.5%)                     | 5 (4.0%)             | 1 (0.8%)                     | 4 (3.3%)             | 0.3118                  |
| Diabetes Mellitus                       | 1 (0.7%)                     | 3 (2.4%)             | 6 (5.0%)                     | 7 (5.8%)             | 0.0923                  |
| Coronary Heart Disease                  | 1 (0.7%)                     | 4 (3.2%)             | 2 (1.7%)                     | 0 (0.0%)             | 0.1647                  |
| Stroke                                  | 1 (0.7%)                     | 3 (2.4%)             | 1 (0.8%)                     | 1 (0.8%)             | 0.5683                  |
| Peptic ulcer                            | 1 (0.7%)                     | 1 (0.8%)             | 0 (0.0%)                     | 0 (0.0%)             | 0.6035                  |

| Parameter                              | Full dose protocol            |                      | Reduced dose protocol         |                      | Testing for differences |
|----------------------------------------|-------------------------------|----------------------|-------------------------------|----------------------|-------------------------|
|                                        | Methylpredni solone (N = 136) | Placebo (N = 126)    | Methylpredni solone (N = 121) | Placebo (N = 120)    |                         |
| Heart Failure                          | 0 (0%)                        | 0 (0%)               | 0 (0%)                        | 0 (0%)               |                         |
| eGFR level at screening                |                               |                      |                               |                      | 0.0086                  |
| N                                      | 136                           | 126                  | 121                           | 120                  |                         |
| Mean (SD)                              | 59.65 (24.380)                | 58.46 (22.959)       | 66.55 (24.405)                | 66.63 (26.781)       |                         |
| Median (IQR)                           | 54.76 (40.48; 72.78)          | 55.97 (42.10; 71.94) | 60.84 (47.30; 82.52)          | 63.49 (42.26; 86.30) |                         |
| Baseline eGFR level                    |                               |                      |                               |                      | 0.0082                  |
| N                                      | 136                           | 126                  | 121                           | 120                  |                         |
| Mean (SD)                              | 58.63 (23.056)                | 57.74 (23.403)       | 63.44 (22.072)                | 66.62 (24.872)       |                         |
| Median (IQR)                           | 54.10 (42.14; 73.71)          | 57.43 (39.40; 69.38) | 58.67 (44.54; 79.78)          | 65.24 (44.23; 84.70) |                         |
| Urine protein (g/24-hour) at screening |                               |                      |                               |                      | 0.3265                  |
| N                                      | 132                           | 125                  | 121                           | 119                  |                         |
| Mean (SD)                              | 2.604 (1.4902)                | 2.361 (1.3721)       | 2.455 (1.5730)                | 2.752 (2.4537)       |                         |
| Median (IQR)                           | 2.160 (1.510; 3.090)          | 2.125 (1.320; 2.920) | 2.060 (1.500; 3.040)          | 1.980 (1.420; 3.128) |                         |
| Baseline urine protein (g/24-hour)     |                               |                      |                               |                      | 0.7075                  |
| N                                      | 136                           | 126                  | 121                           | 120                  |                         |
| Mean (SD)                              | 2.506 (1.6775)                | 2.372 (1.2377)       | 2.382 (1.4090)                | 2.579 (2.0909)       |                         |
| Median (IQR)                           | 2.108 (1.475; 3.033)          | 1.928 (1.490; 2.865) | 1.975 (1.390; 2.960)          | 2.012 (1.496; 3.055) |                         |
| Time since renal biopsy (month)        |                               |                      |                               |                      | 0.0098                  |
| N                                      | 136                           | 125                  | 121                           | 120                  |                         |
| Mean (SD)                              | 13.21 (33.634)                | 10.79 (36.482)       | 15.66 (20.810)                | 24.24 (38.387)       |                         |
| Median (IQR)                           | 5.00 (4.00; 8.00)             | 4.00 (3.00; 8.00)    | 5.00 (3.00; 18.00)            | 6.00 (4.00; 27.00)   |                         |
| Mesangial hypercellularity             |                               |                      |                               |                      | 0.9029                  |
| M0                                     | 56 (42.4%)                    | 48 (39.0%)           | 49 (40.8%)                    | 45 (38.1%)           |                         |
| M1                                     | 76 (57.6%)                    | 75 (61.0%)           | 71 (59.2%)                    | 73 (61.9%)           |                         |
| Segmental glomerulosclerosis           |                               |                      |                               |                      | 0.3521                  |
| S0                                     | 38 (28.8%)                    | 34 (27.6%)           | 42 (35.0%)                    | 43 (36.4%)           |                         |
| S1                                     | 94 (71.2%)                    | 89 (72.4%)           | 78 (65.0%)                    | 75 (63.6%)           |                         |
| Endocapillary hypercellularity         |                               |                      |                               |                      | 0.2208                  |
| E0                                     | 93 (68.4%)                    | 96 (76.2%)           | 92 (76.0%)                    | 95 (79.2%)           |                         |
| E1                                     | 43 (31.6%)                    | 30 (23.8%)           | 29 (24.0%)                    | 25 (20.8%)           |                         |
| Tubular atrophy/interstitial fibrosis  |                               |                      |                               |                      | <.0001                  |
| T0                                     | 51 (38.6%)                    | 43 (35.0%)           | 72 (60.0%)                    | 75 (63.6%)           |                         |
| T1                                     | 58 (43.9%)                    | 60 (48.8%)           | 34 (28.3%)                    | 35 (29.7%)           |                         |
| T2                                     | 23 (17.4%)                    | 20 (16.3%)           | 14 (11.7%)                    | 8 (6.8%)             |                         |

SD, standard deviation; Percentages may not total 100 because of rounding; Q denotes quartile

† Race or ethnic group was reported by the patients.

‡ The body-mass index is the weight in kilograms divided by the square of the height in meters.

eGFR, estimated glomerular filtration rate



| <b>eTable 4: Serious Adverse Events by randomized group overall, and for the full and reduced methylprednisolone dosage regimens</b> |                                         |                              |                                         |                              |                                         |                              |
|--------------------------------------------------------------------------------------------------------------------------------------|-----------------------------------------|------------------------------|-----------------------------------------|------------------------------|-----------------------------------------|------------------------------|
|                                                                                                                                      | <b>Overall combined results</b>         |                              | <b>Full Dose Regimen</b>                |                              | <b>Reduced Dose Regimen</b>             |                              |
|                                                                                                                                      | <b>Methylprednisolone<br/>(N = 257)</b> | <b>Placebo<br/>(N = 246)</b> | <b>Methylprednisolone<br/>(N = 136)</b> | <b>Placebo<br/>(N = 126)</b> | <b>Methylprednisolone<br/>(N = 121)</b> | <b>Placebo<br/>(N = 120)</b> |
| Number of SAEs, No.                                                                                                                  | 37                                      | 8                            | 30                                      | 5                            | 7                                       | 3                            |
| Number of patients with at least one SAE <sup>a</sup> , No.(%)                                                                       | 28 (11)                                 | 7 (3)                        | 22 (16)                                 | 4 (3)                        | 6 (5)                                   | 3 (3)                        |
| Hospitalization/Prolongation of hospitalization                                                                                      | 25 (10)                                 | 7 (3)                        | 19 (14)                                 | 4 (3)                        | 6 (5)                                   | 3 (3)                        |
| Resulted in death                                                                                                                    | 4 (2)                                   | 0 (0)                        | 3 (2)                                   | 0 (0)                        | 1 (0.8)                                 | 0 (0)                        |
| Life-threatening                                                                                                                     | 4 (2)                                   | 0 (0)                        | 3 (2)                                   | 0 (0)                        | 1 (0.8)                                 | 0 (0)                        |
| Important medical event <sup>b</sup>                                                                                                 | 2 (0.8)                                 | 0 (0)                        | 1 (0)                                   | 0 (0)                        | 1 (0.8)                                 | 0 (0)                        |
| Persistent/Significant disability/Incapacity                                                                                         | 1 (0.4)                                 | 0 (0)                        | 1 (0.7)                                 | 0 (0)                        | 0 (0)                                   | 0 (0)                        |
| Congenital anomaly/Birth defect <sup>c</sup>                                                                                         | 0 (0)                                   | 0 (0)                        | 0 (0)                                   | 0 (0)                        | 0 (0)                                   | 0 (0)                        |
| Number of patients reporting the following SAEs of special interest per protocol <sup>d</sup> , No.(%)                               |                                         |                              |                                         |                              |                                         |                              |
| Severe infection requiring hospitalization                                                                                           | 17(7)                                   | 3 (1)                        | 12(9)                                   | 1 (0.8)                      | 5 (4)                                   | 2 (2)                        |
| Pneumocystis jirovecii pneumonia                                                                                                     | 4(2)                                    | 0(0)                         | 4(3)                                    | 0(0)                         | 0(0)                                    | 0(0)                         |
| Pneumonia or respiratory tract infection                                                                                             | 3(1)                                    | 0(0)                         | 3(2)                                    | 0(0)                         | 0                                       | 0(0)                         |
| Sepsis                                                                                                                               | 2(0.8)                                  | 1(0.4)                       | 0(0)                                    | 0(0)                         | 2(2)                                    | 1(0.8)                       |
| Urinary tract infection                                                                                                              | 2(0.8)                                  | 0(0)                         | 1(0.7)                                  | 0(0)                         | 1(0.8)                                  | 0(0)                         |
| Multiple skin infection                                                                                                              | 1(0.4)                                  | 0(0)                         | 0(0)                                    | 0(0)                         | 1(0.8)                                  | 0(0)                         |
| Nocardia infection                                                                                                                   | 1(0.4)                                  | 0(0)                         | 1(0.7)                                  | 0(0)                         | 0(0)                                    | 0(0)                         |
| Cryptococcal meningitis                                                                                                              | 1(0.4)                                  | 0(0)                         | 1(0.7)                                  | 0(0)                         | 0(0)                                    | 0(0)                         |
| Tuberculosis with bacterial infection                                                                                                | 1(0.4)                                  | 0(0)                         | 0(0)                                    | 0(0)                         | 1(0.8)                                  | 0(0)                         |
| Perianal abscess                                                                                                                     | 1(0.4)                                  | 0(0)                         | 1(0.7)                                  | 0(0)                         | 0(0)                                    | 0(0)                         |
| Acute febrile illness                                                                                                                | 0(0)                                    | 1(0.4)                       | 0(0)                                    | 0(0)                         | 0(0)                                    | 1(0.8)                       |
| Other infection                                                                                                                      | 1(0.4)                                  | 1(0.4)                       | 1(0.7)                                  | 1(0.8)                       | 0(0)                                    | 0(0)                         |
| Gastrointestinal bleeding requiring hospitalization <sup>e</sup>                                                                     | 3 (1)                                   | 1 (0.4)                      | 3 (2)                                   | 1 (0.8)                      | 0 (0)                                   | 0 (0)                        |
| Clinically evident fracture or osteonecrosis                                                                                         | 3 (1)                                   | 0 (0)                        | 3 (2)                                   | 0 (0)                        | 0 (0)                                   | 0 (0)                        |
| New onset diabetes mellitus                                                                                                          | 2 (0.8)                                 | 0 (0)                        | 0 (0)                                   | 0 (0)                        | 2 (2)                                   | 0 (0)                        |

| <b>eTable 4: Serious Adverse Events by randomized group overall, and for the full and reduced methylprednisolone dosage regimens</b>                                                                                                                                                                                                                                                                                                                                                                                                                                                                                                                                                                                                                                                                                                                                                                                                                                                                                     |                                         |                              |                                         |                              |                                         |                              |
|--------------------------------------------------------------------------------------------------------------------------------------------------------------------------------------------------------------------------------------------------------------------------------------------------------------------------------------------------------------------------------------------------------------------------------------------------------------------------------------------------------------------------------------------------------------------------------------------------------------------------------------------------------------------------------------------------------------------------------------------------------------------------------------------------------------------------------------------------------------------------------------------------------------------------------------------------------------------------------------------------------------------------|-----------------------------------------|------------------------------|-----------------------------------------|------------------------------|-----------------------------------------|------------------------------|
|                                                                                                                                                                                                                                                                                                                                                                                                                                                                                                                                                                                                                                                                                                                                                                                                                                                                                                                                                                                                                          | <b>Overall combined results</b>         |                              | <b>Full Dose Regimen</b>                |                              | <b>Reduced Dose Regimen</b>             |                              |
|                                                                                                                                                                                                                                                                                                                                                                                                                                                                                                                                                                                                                                                                                                                                                                                                                                                                                                                                                                                                                          | <b>Methylprednisolone<br/>(N = 257)</b> | <b>Placebo<br/>(N = 246)</b> | <b>Methylprednisolone<br/>(N = 136)</b> | <b>Placebo<br/>(N = 126)</b> | <b>Methylprednisolone<br/>(N = 121)</b> | <b>Placebo<br/>(N = 120)</b> |
| <p><sup>a</sup> All serious adverse events were reported by site investigators and reviewed by the medical reviewer. The definition of a serious adverse event was derived from the International Conference on Harmonization Guideline for Clinical Safety Data Management and comprised the six listed categories.</p> <p><sup>b</sup> First reported Pneumocystis Carinii Pneumonia and Gram negative sepsis that was reported initially reported as acute tubular necrosis with prolonged hospitalization.</p> <p><sup>c</sup> There was no pregnancy reported during the treatment period hence no congenital anomaly or birth defect recorded.</p> <p><sup>d</sup> There were no major cardiovascular events reported, defined as a composite of myocardial infarction, stroke, heart failure requiring hospitalisation or death due to cardiovascular disease</p> <p><sup>e</sup>One pneumocystis jirovecii pneumonia infection was misclassified as gastrointestinal bleeding in the interim analysis report</p> |                                         |                              |                                         |                              |                                         |                              |

eFigure 1: Summary of sequence of events of the TESTING trial

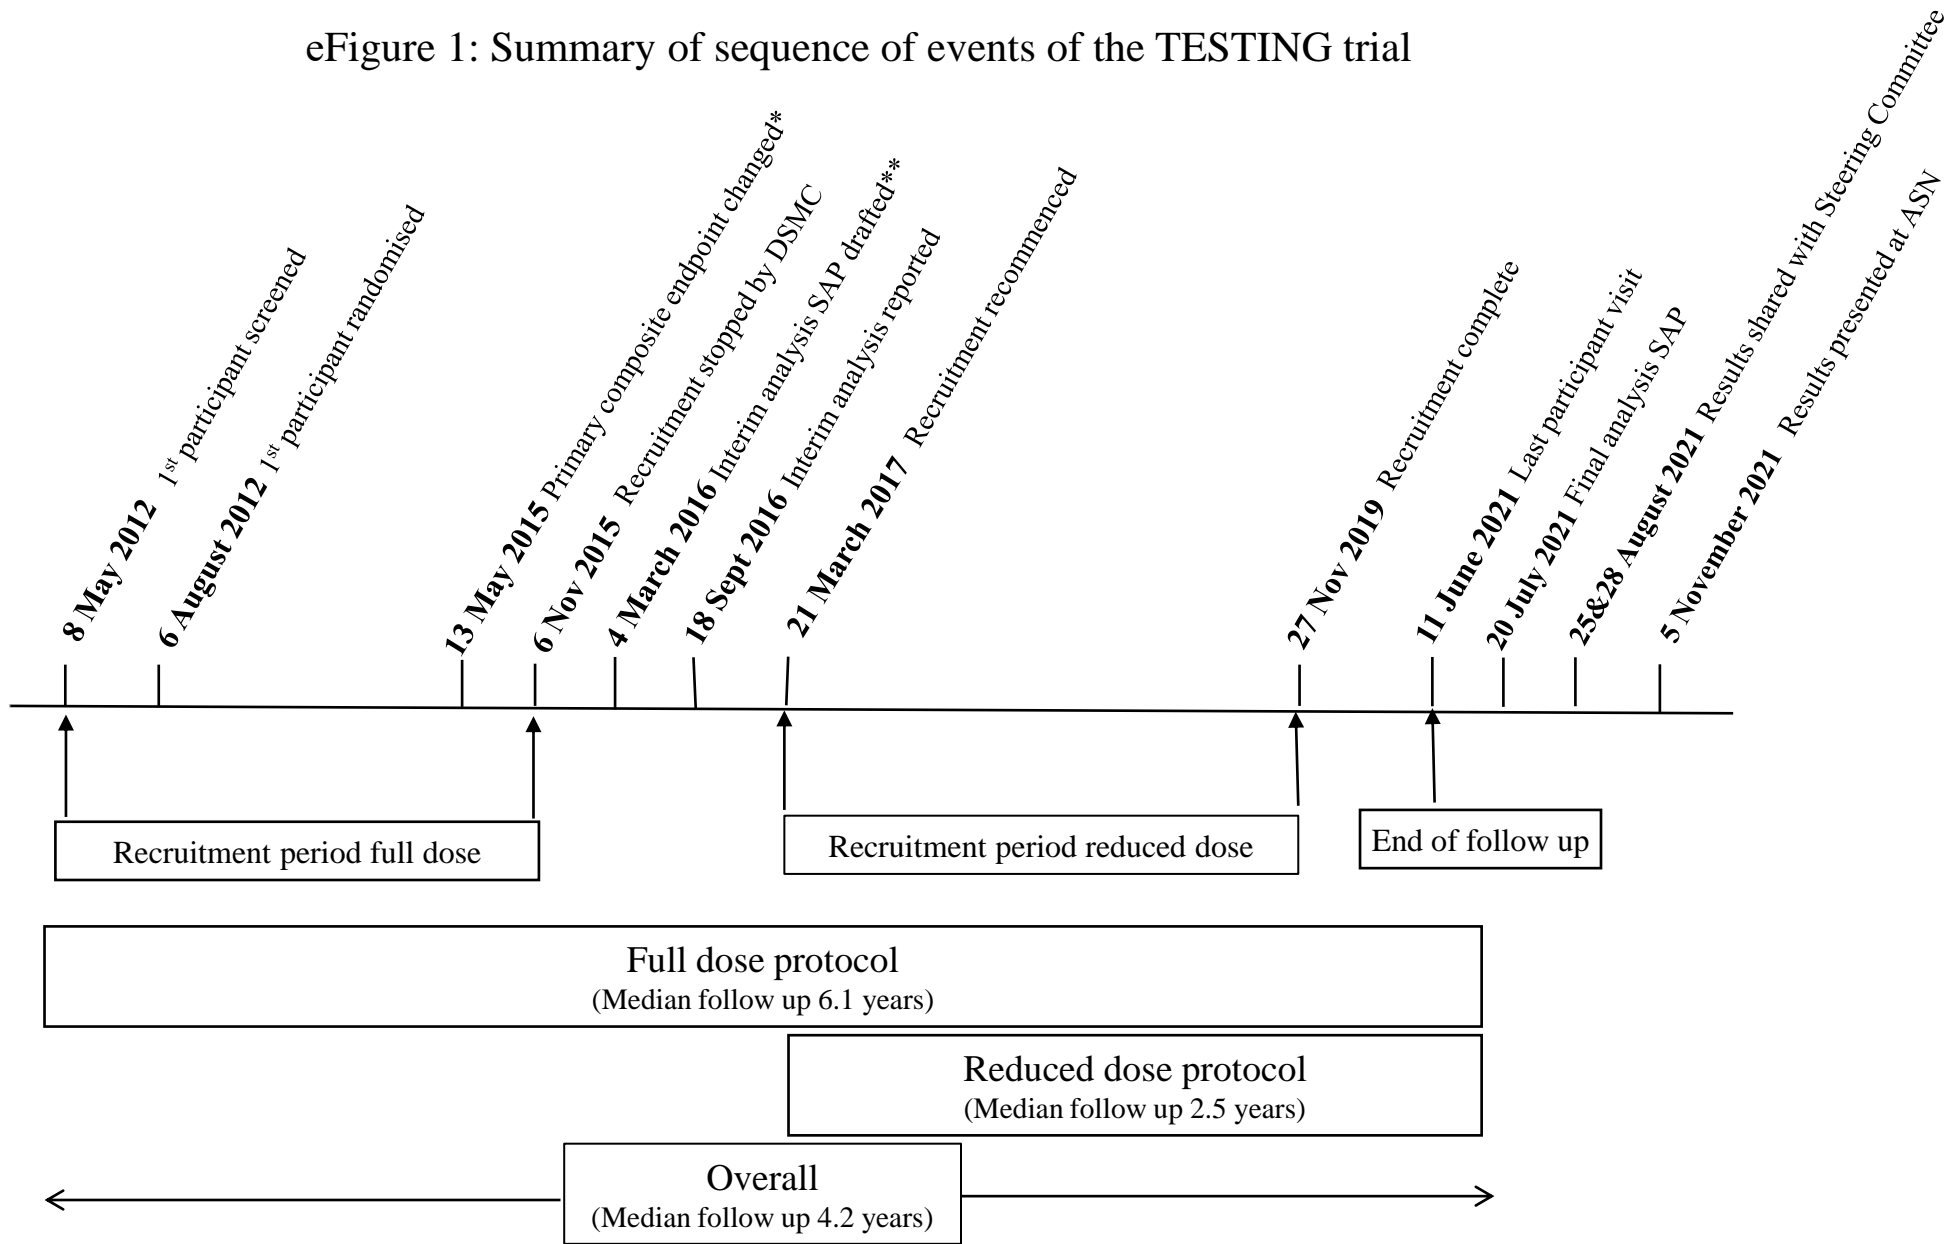

\* Sustained 50% eGFR reduction is replaced with 40% eGFR reduction based on

\*\*SAP, statistical analysis plan was finalised by a SAP subcommittee of the Steering Committee, who were blinded to the interim analysis results  
© 2022 American Medical Association. All rights reserved.  
 DSMC, data safety monitoring committee

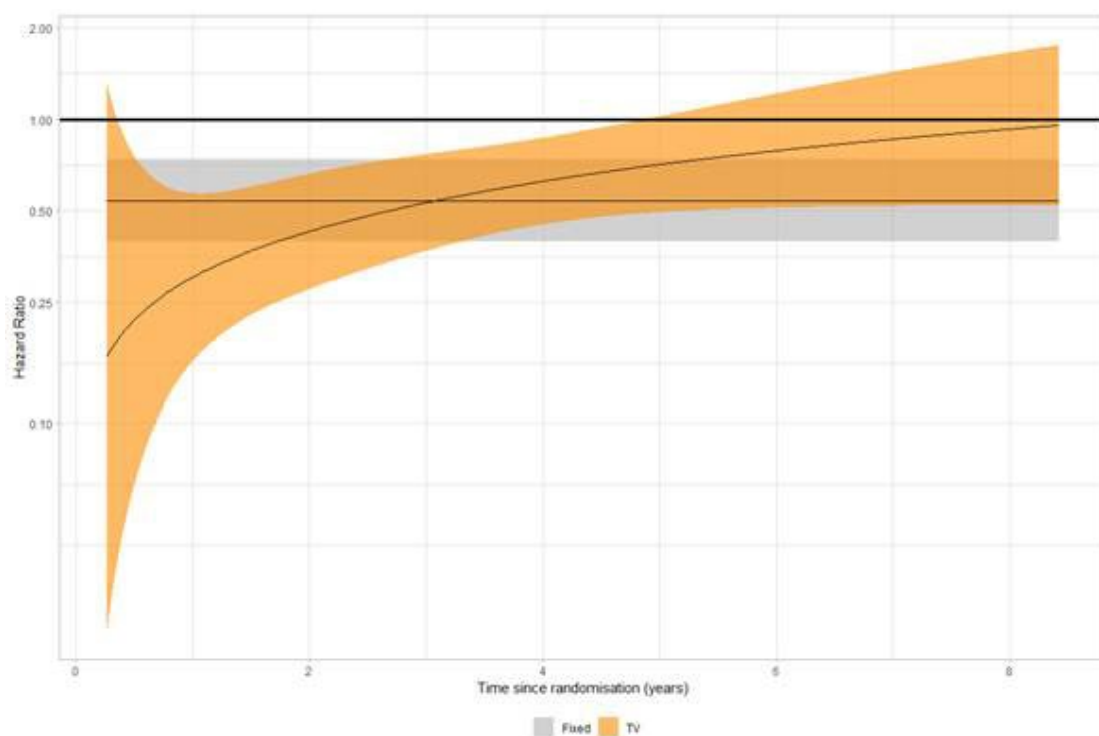

**eFigure 2:** A post-hoc sensitivity analysis was run using flexible parametric survival models with either constant (grey) or time-varying hazard ratios (orange). The flexible model with constant HR was very similar to the Cox model, with an estimate HR of 0.54 (95% CI 0.39; 0.74). There was some evidence ( $p=.024$ ) that the time-varying HR was a better fit to the study data than a constant HR, however, both approaches consistently estimated a significant risk reduction with methylprednisolone.

A) Mean 24 hour protein excretion by randomized group over time

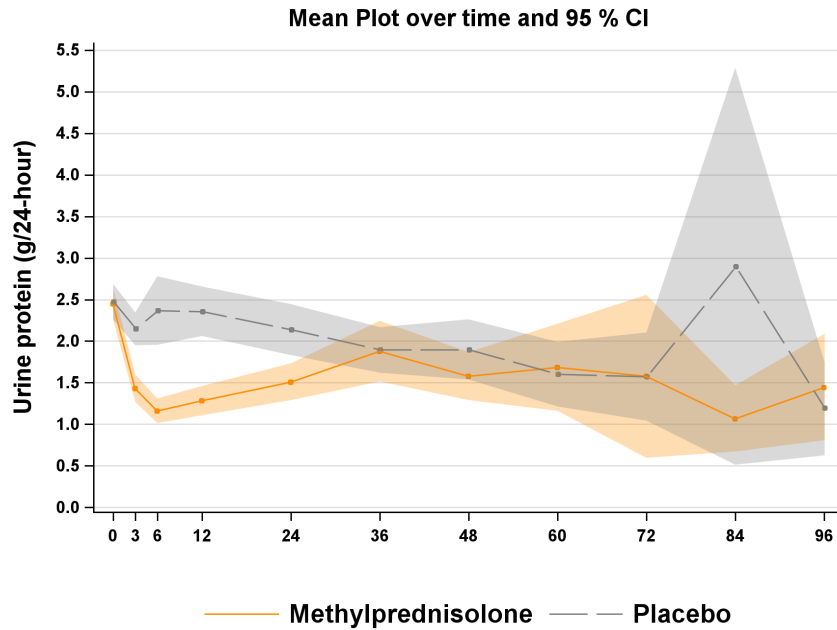

Number of patients :

|                    |     |     |     |     |     |    |    |    |    |    |
|--------------------|-----|-----|-----|-----|-----|----|----|----|----|----|
| Methylprednisolone | 257 | 227 | 213 | 178 | 132 | 86 | 54 | 16 | 13 | 11 |
| Placebo            | 246 | 217 | 200 | 159 | 98  | 71 | 48 | 14 | 10 | 15 |

B) Mean eGFR over time

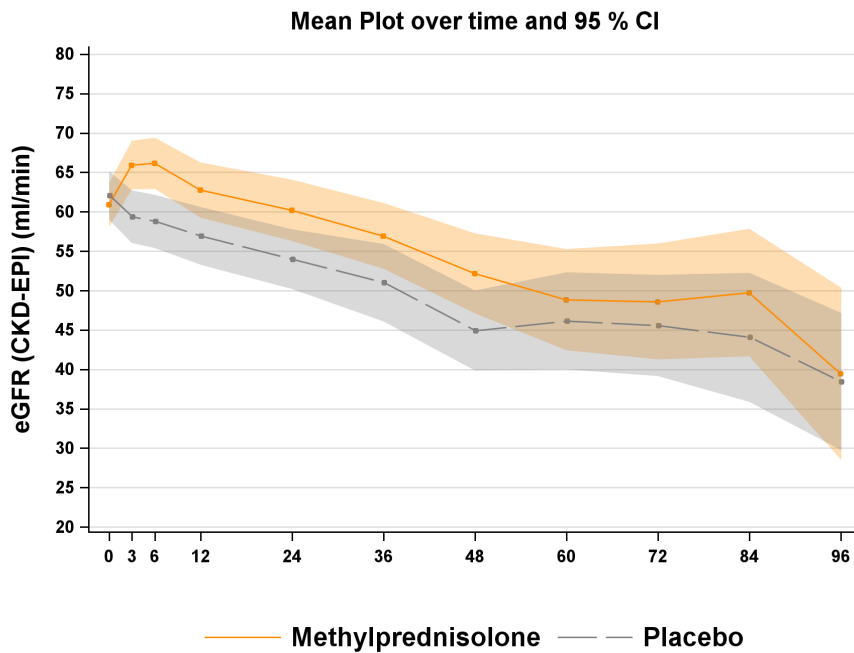

Number of patients :

|                    |     |     |     |     |     |     |    |    |    |    |
|--------------------|-----|-----|-----|-----|-----|-----|----|----|----|----|
| Methylprednisolone | 257 | 232 | 218 | 200 | 155 | 104 | 71 | 66 | 45 | 22 |
| Placebo            | 246 | 225 | 209 | 185 | 123 | 90  | 59 | 59 | 30 | 24 |

**eFigure 3: Proteinuria and eGFR Reduction by randomized group over time**

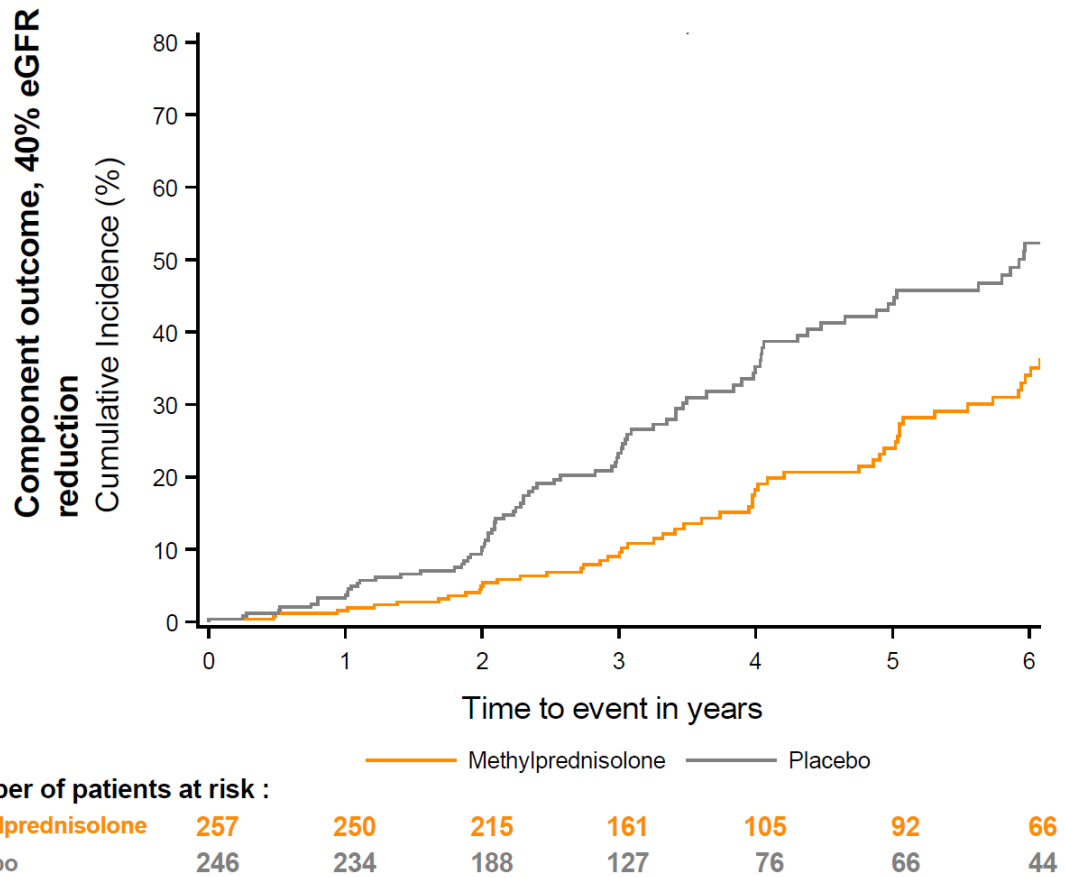

**eFigure 4: Time From Randomization to First Outcome of 40% eGFR Decrease by Treatment Group**
