# Supplementary material
Source: PubMed Central journal article supplement (PMC9115617)
Supplement: jama-e225368-s003.pdf [file jama-e225368-s003.pdf]

\*Indicates required information. Only first name, last name, and suffix will appear in PubMed.

| <b>*Group Name(s): The TESTING Study Group Collaborating Investigators</b> |                   |                              |                  |                                       |                                          |                                                         |                                                                                            |
|----------------------------------------------------------------------------|-------------------|------------------------------|------------------|---------------------------------------|------------------------------------------|---------------------------------------------------------|--------------------------------------------------------------------------------------------|
| <b>*First Name and Middle Initial(s)</b>                                   | <b>*Last Name</b> | <b>*Suffix (eg, Jr, III)</b> | Academic Degrees | Institution                           | Location (city, state/province, country) | Role or Contribution, eg, chair, principal investigator | Group (if more than 1 Group listed in the byline) and/or Subgroup (eg, Steering Committee) |
| Mona                                                                       | Razavian          |                              |                  | Concord Repatriation General Hospital | Sydney, Australia                        | Site principal investigator                             |                                                                                            |
| Martin                                                                     | Gallagher         |                              |                  | Concord Repatriation General Hospital | Sydney, Australia                        |                                                         |                                                                                            |
| Frances                                                                    | Daley             |                              |                  | Concord Repatriation General Hospital | Sydney, Australia                        |                                                         |                                                                                            |
| Samantha                                                                   | Hand              |                              |                  | Concord Repatriation General Hospital | Sydney, Australia                        |                                                         |                                                                                            |
| Helen                                                                      | Knight            |                              |                  | Concord Repatriation General Hospital | Sydney, Australia                        |                                                         |                                                                                            |
| Sarah                                                                      | Gallagher         |                              |                  | Concord Repatriation General Hospital | Sydney, Australia                        |                                                         |                                                                                            |
| Bhadran                                                                    | Bose              |                              |                  | Nepean Hospital                       | Sydney, Australia                        | Site principal investigator                             |                                                                                            |
| Craig                                                                      | Lawlor            |                              |                  | Nepean Hospital                       | Sydney, Australia                        |                                                         |                                                                                            |
| Junie                                                                      | McCourt           |                              |                  | Nepean Hospital                       | Sydney, Australia                        | Site principal investigator                             |                                                                                            |
| Chen Au                                                                    | Peh               |                              |                  | Royal Adelaide Hospital               | Adelaide, South Australia, Australia     |                                                         |                                                                                            |
| Eileen                                                                     | Scott             |                              |                  | Royal Adelaide Hospital               | Adelaide, South Australia, Australia     |                                                         |                                                                                            |
| Robert                                                                     | Carroll           |                              |                  | Royal Adelaide Hospital               | Adelaide, South Australia, Australia     |                                                         |                                                                                            |
| Toby                                                                       | Coates            |                              |                  | Royal Adelaide Hospital               | Adelaide, South Australia, Australia     |                                                         |                                                                                            |
| Bronwyn                                                                    | Hockley           |                              |                  | Royal Adelaide Hospital               | Adelaide, South Australia, Australia     |                                                         |                                                                                            |
| Megan                                                                      | Hockley           |                              |                  | Royal Adelaide Hospital               | Adelaide, South Australia, Australia     |                                                         |                                                                                            |
| Jenny                                                                      | Latte             |                              |                  | Royal Adelaide Hospital               | Adelaide, South Australia, Australia     |                                                         |                                                                                            |

## Supplemental Online Content: Nonauthor Collaborators

\*Indicates required information. Only first name, last name, and suffix will appear in PubMed.

| *First Name and Middle Initial(s) | *Last Name            | *Suffix (eg, Jr, III) | Academic Degrees | Institution                | Location (city, state/province, country) | Role or Contribution, eg, chair, principal investigator | Group (if more than 1 Group listed in the byline) and/or Subgroup (eg, Steering Committee) |
|-----------------------------------|-----------------------|-----------------------|------------------|----------------------------|------------------------------------------|---------------------------------------------------------|--------------------------------------------------------------------------------------------|
| Kathy                             | Nicholls              |                       |                  | Royal Melbourne Hospital   | Melbourne, Victoria, Australia           | Site principal investigator                             |                                                                                            |
| Michael                           | Cai                   |                       |                  | Royal Melbourne Hospital   | Melbourne, Victoria, Australia           |                                                         |                                                                                            |
| Paul                              | Champion de Crespigny |                       |                  | Royal Melbourne Hospital   | Melbourne, Victoria, Australia           |                                                         |                                                                                            |
| Therese                           | Cronin                |                       |                  | Royal Melbourne Hospital   | Melbourne, Victoria, Australia           |                                                         |                                                                                            |
| Maria                             | Farrell               |                       |                  | Royal Melbourne Hospital   | Melbourne, Victoria, Australia           |                                                         |                                                                                            |
| Peter                             | Hughes                |                       |                  | Royal Melbourne Hospital   | Melbourne, Victoria, Australia           |                                                         |                                                                                            |
| Rosemary                          | Masterson             |                       |                  | Royal Melbourne Hospital   | Melbourne, Victoria, Australia           |                                                         |                                                                                            |
| Gloria                            | Sepe                  |                       |                  | Royal Melbourne Hospital   | Melbourne, Victoria, Australia           |                                                         |                                                                                            |
| Sven-Jean                         | Tan                   |                       |                  | Royal Melbourne Hospital   | Melbourne, Victoria, Australia           |                                                         |                                                                                            |
| Nigel                             | Toussaint             |                       |                  | Royal Melbourne Hospital   | Melbourne, Victoria, Australia           |                                                         |                                                                                            |
| Rachel                            | Wollstencroft         |                       |                  | Royal Melbourne Hospital   | Melbourne, Victoria, Australia           |                                                         |                                                                                            |
| Bruce                             | Cooper                |                       |                  | Royal North Shore Hospital | St Leonards, Sydney, Australia           | Site principal investigator                             |                                                                                            |
| Marjorie                          | Chang                 |                       |                  | Royal North Shore Hospital | St Leonards, Sydney, Australia           |                                                         |                                                                                            |
| Helen                             | Clayton               |                       |                  | Royal North Shore Hospital | St Leonards, Sydney, Australia           |                                                         |                                                                                            |
| Stephanie                         | Tan                   |                       |                  | Royal North Shore Hospital | St Leonards, Sydney, Australia           |                                                         |                                                                                            |
| Heidi                             | Tsang                 |                       |                  | Royal North Shore Hospital | St Leonards, Sydney, Australia           |                                                         |                                                                                            |

## Supplemental Online Content: Nonauthor Collaborators

\*Indicates required information. Only first name, last name, and suffix will appear in PubMed.

| *First Name and Middle Initial(s) | *Last Name       | *Suffix (eg, Jr, III) | Academic Degrees | Institution                  | Location (city, state/province, country) | Role or Contribution, eg, chair, principal investigator | Group (if more than 1 Group listed in the byline) and/or Subgroup (eg, Steering Committee) |
|-----------------------------------|------------------|-----------------------|------------------|------------------------------|------------------------------------------|---------------------------------------------------------|--------------------------------------------------------------------------------------------|
| Joanna                            | Sudak            |                       |                  | Princess Alexandra Hospital  | Brisbane, Queensland, Australia          |                                                         |                                                                                            |
| Louis P                           | Laurin           |                       |                  | Hôpital Maisonneuve-Rosemont | Montréal, Québec, Canada                 | Site principal investigator                             |                                                                                            |
| Vincent                           | Pichette         |                       |                  | Hôpital Maisonneuve-Rosemont | Montréal, Québec, Canada                 |                                                         |                                                                                            |
| Karine                            | Chausse          |                       |                  | Hôpital Maisonneuve-Rosemont | Montréal, Québec, Canada                 |                                                         |                                                                                            |
| Martine                           | Comeau           |                       |                  | Hôpital Maisonneuve-Rosemont | Montréal, Québec, Canada                 |                                                         |                                                                                            |
| Lucy                              | Lepine           |                       |                  | Hôpital Maisonneuve-Rosemont | Montréal, Québec, Canada                 |                                                         |                                                                                            |
| Marie                             | Soliel           |                       |                  | Hôpital Maisonneuve-Rosemont | Montréal, Québec, Canada                 |                                                         |                                                                                            |
| Stephanie                         | Beauchemin       |                       |                  | Hôpital Maisonneuve-Rosemont | Montréal, Québec, Canada                 |                                                         |                                                                                            |
| Emilie                            | René             |                       |                  | Hôpital Maisonneuve-Rosemont | Montréal, Québec, Canada                 |                                                         |                                                                                            |
| Marceline                         | Quach            |                       |                  | Hôpital Maisonneuve-Rosemont | Montréal, Québec, Canada                 |                                                         |                                                                                            |
| Karine                            | Daoust           |                       |                  | Hôpital Maisonneuve-Rosemont | Montréal, Québec, Canada                 |                                                         |                                                                                            |
| Ariane                            | Lessard          |                       |                  | Hôpital Maisonneuve-Rosemont | Montréal, Québec, Canada                 |                                                         |                                                                                            |
| Maude                             | Bachand-Fournier |                       |                  | Hôpital Maisonneuve-Rosemont | Montréal, Québec, Canada                 |                                                         |                                                                                            |
| Marysa                            | Bétournay        |                       |                  | Hôpital Maisonneuve-Rosemont | Montréal, Québec, Canada                 |                                                         |                                                                                            |
| Marie-Soleil                      | Paradis          |                       |                  | Hôpital Maisonneuve-Rosemont | Montréal, Québec, Canada                 |                                                         |                                                                                            |
| Mukelda                           | Mikye Castor     |                       |                  | Hôpital Maisonneuve-Rosemont | Montréal, Québec, Canada                 |                                                         |                                                                                            |

## Supplemental Online Content: Nonauthor Collaborators

\*Indicates required information. Only first name, last name, and suffix will appear in PubMed.

| *First Name and Middle Initial(s) | *Last Name      | *Suffix (eg, Jr, III) | Academic Degrees | Institution                     | Location (city, state/province, country) | Role or Contribution, eg, chair, principal investigator | Group (if more than 1 Group listed in the byline) and/or Subgroup (eg, Steering Committee) |
|-----------------------------------|-----------------|-----------------------|------------------|---------------------------------|------------------------------------------|---------------------------------------------------------|--------------------------------------------------------------------------------------------|
| Susan                             | Huang           |                       |                  | London Health Sciences Centre   | London, Ontario, Canada                  | Site principal investigator                             |                                                                                            |
| Louise                            | Moist           |                       |                  | London Health Sciences Centre   | London, Ontario, Canada                  |                                                         |                                                                                            |
| Kerri                             | Gallo           |                       |                  | London Health Sciences Centre   | London, Ontario, Canada                  |                                                         |                                                                                            |
| Rachel                            | VanWesenbeeck   |                       |                  | London Health Sciences Centre   | London, Ontario, Canada                  |                                                         |                                                                                            |
| Teresa                            | Longfield       |                       |                  | London Health Sciences Centre   | London, Ontario, Canada                  |                                                         |                                                                                            |
| Faith                             | Norris          |                       |                  | London Health Sciences Centre   | London, Ontario, Canada                  |                                                         |                                                                                            |
| Amy                               | Moyer           |                       |                  | London Health Sciences Centre   | London, Ontario, Canada                  |                                                         |                                                                                            |
| Zabrina                           | Bailey Lozon    |                       |                  | London Health Sciences Centre   | London, Ontario, Canada                  |                                                         |                                                                                            |
| Matthew                           | Miller          |                       |                  | St Joseph's Healthcare Hamilton | Hamilton, Ontario, Canada                | Site principal investigator                             |                                                                                            |
| Catherine                         | Clase           |                       |                  | St Joseph's Healthcare Hamilton | Hamilton, Ontario, Canada                |                                                         |                                                                                            |
| Christian                         | Rabbat          |                       |                  | St Joseph's Healthcare Hamilton | Hamilton, Ontario, Canada                |                                                         |                                                                                            |
| Madison                           | Salisbury       |                       |                  | St Joseph's Healthcare Hamilton | Hamilton, Ontario, Canada                |                                                         |                                                                                            |
| Andrea                            | Mazzetti Vieira |                       |                  | St Joseph's Healthcare Hamilton | Hamilton, Ontario, Canada                |                                                         |                                                                                            |
| Faraz                             | Lalji           |                       |                  | St Joseph's Healthcare Hamilton | Hamilton, Ontario, Canada                |                                                         |                                                                                            |
| Cathy                             | Moreau          |                       |                  | St Joseph's Healthcare Hamilton | Hamilton, Ontario, Canada                |                                                         |                                                                                            |
| Neesh                             | Pannu           |                       |                  | University of Alberta Hospitals | Edmonton, Canada                         | Site principal investigator                             |                                                                                            |
| Ainslie                           | Hildebrand      |                       |                  | University of Alberta Hospitals | Edmonton, Canada                         |                                                         |                                                                                            |

## Supplemental Online Content: Nonauthor Collaborators

\*Indicates required information. Only first name, last name, and suffix will appear in PubMed.

| *First Name and Middle Initial(s) | *Last Name | *Suffix (eg, Jr, III) | Academic Degrees | Institution                                   | Location (city, state/province, country) | Role or Contribution, eg, chair, principal investigator | Group (if more than 1 Group listed in the byline and/or Subgroup (eg, Steering Committee)) |
|-----------------------------------|------------|-----------------------|------------------|-----------------------------------------------|------------------------------------------|---------------------------------------------------------|--------------------------------------------------------------------------------------------|
| Nancy                             | Ruholl     |                       |                  | University of Alberta Hospitals               | Edmonton, Canada                         |                                                         |                                                                                            |
| Nasreen                           | Ahmad      |                       |                  | University of Alberta Hospitals               | Edmonton, Canada                         |                                                         |                                                                                            |
| Maliha                            | Muneer     |                       |                  | University of Alberta Hospitals               | Edmonton, Canada                         |                                                         |                                                                                            |
| Louise                            | Girard     |                       |                  | University of Calgary/Alberta Health Services | Calgary, Canada                          | Site principal investigator                             |                                                                                            |
| Michelle Catherine                | Mann       |                       |                  | University of Calgary/Alberta Health Services | Calgary, Canada                          |                                                         |                                                                                            |
| Brenda                            | Hemmelgarn |                       |                  | University of Calgary/Alberta Health Services | Calgary, Canada                          |                                                         |                                                                                            |
| Braden                            | Manns      |                       |                  | University of Calgary/Alberta Health Services | Calgary, Canada                          |                                                         |                                                                                            |
| Pietro                            | Ravani     |                       |                  | University of Calgary/Alberta Health Services | Calgary, Canada                          |                                                         |                                                                                            |
| Shelia                            | Li         |                       |                  | University of Calgary/Alberta Health Services | Calgary, Canada                          |                                                         |                                                                                            |
| Janice                            | Mackay     |                       |                  | University of Calgary/Alberta Health Services | Calgary, Canada                          |                                                         |                                                                                            |
| Sharon                            | Gulewich   |                       |                  | University of Calgary/Alberta Health Services | Calgary, Canada                          |                                                         |                                                                                            |
| Zainab                            | Sheriff    |                       |                  | St Paul's Hospital                            | Vancouver, British Columbia, Canada      |                                                         |                                                                                            |
| Jack                              | Ferera     |                       |                  | St Paul's Hospital                            | Vancouver, British Columbia, Canada      |                                                         |                                                                                            |
| Katy                              | Vela       |                       |                  | St Paul's Hospital                            | Vancouver, British Columbia, Canada      |                                                         |                                                                                            |
| Anny                              | Gonzalez   |                       |                  | Sunnybrook Health Sciences Centre             | Toronto, Ontario, Canada                 |                                                         |                                                                                            |
| Arti                              | Bhasin     |                       |                  | Sunnybrook Health Sciences Centre             | Toronto, Ontario, Canada                 |                                                         |                                                                                            |
| Ping                              | Lam        |                       |                  | Toronto General Hospital                      | Toronto, Ontario, Canada                 |                                                         |                                                                                            |
| Fatima                            | Haji       |                       |                  | Toronto General Hospital                      | Toronto, Ontario, Canada                 |                                                         |                                                                                            |

## Supplemental Online Content: Nonauthor Collaborators

\*Indicates required information. Only first name, last name, and suffix will appear in PubMed.

| *First Name and Middle Initial(s) | *Last Name | *Suffix (eg, Jr, III) | Academic Degrees | Institution                                                                                                          | Location (city, state/province, country) | Role or Contribution, eg, chair, principal investigator | Group (if more than 1 Group listed in the byline) and/or Subgroup (eg, Steering Committee) |
|-----------------------------------|------------|-----------------------|------------------|----------------------------------------------------------------------------------------------------------------------|------------------------------------------|---------------------------------------------------------|--------------------------------------------------------------------------------------------|
| Sufang                            | Shi        |                       |                  | Peking University First Hospital                                                                                     | Beijing, China                           |                                                         |                                                                                            |
| Lijun                             | Liu        |                       |                  | Peking University First Hospital                                                                                     | Beijing, China                           |                                                         |                                                                                            |
| Yunfei                            | Bao        |                       |                  | Peking University First Hospital                                                                                     | Beijing, China                           |                                                         |                                                                                            |
| Guilli                            | Sui        |                       |                  | Peking University First Hospital                                                                                     | Beijing, China                           |                                                         |                                                                                            |
| Caili                             | Wang       |                       |                  | The First Affiliated Hospital of Baotou Medical College, Inner Mongolia University of Science and Technology, Baotou | Baotou, China                            | Site principal investigator                             |                                                                                            |
| Zengyan                           | Li         |                       |                  | The First Affiliated Hospital of Baotou Medical College, Inner Mongolia University of Science and Technology, Baotou | Baotou, China                            |                                                         |                                                                                            |
| Li                                | Lv         |                       |                  | The First Affiliated Hospital of Baotou Medical College, Inner Mongolia University of Science and Technology, Baotou | Baotou, China                            |                                                         |                                                                                            |
| Lan                               | Yang       |                       |                  | The First Affiliated Hospital of Baotou Medical College, Inner Mongolia University of Science and Technology, Baotou | Baotou, China                            |                                                         |                                                                                            |
| Haitao                            | Li         |                       |                  | The First Affiliated Hospital of Baotou Medical College, Inner Mongolia University of Science and Technology, Baotou | Baotou, China                            |                                                         |                                                                                            |
| Zhangsuo                          | Liu        |                       |                  | The First Affiliated Hospital of Zhengzhou University                                                                | Zhengzhou, China                         | Site principal investigator                             |                                                                                            |
| Junjun                            | Zhang      |                       |                  | The First Affiliated Hospital of Zhengzhou University                                                                | Zhengzhou, China                         |                                                         |                                                                                            |
| Bo                                | Huang      |                       |                  | The First Affiliated Hospital of Zhengzhou University                                                                | Zhengzhou, China                         |                                                         |                                                                                            |
| Yang                              | Yang       |                       |                  | The First Affiliated Hospital of Zhengzhou University                                                                | Zhengzhou, China                         |                                                         |                                                                                            |

## Supplemental Online Content: Nonauthor Collaborators

\*Indicates required information. Only first name, last name, and suffix will appear in PubMed.

| *First Name and Middle Initial(s) | *Last Name | *Suffix (eg, Jr, III) | Academic Degrees | Institution                                                     | Location (city, state/province, country) | Role or Contribution, eg, chair, principal investigator | Group (if more than 1 Group listed in the byline) and/or Subgroup (eg, Steering Committee) |
|-----------------------------------|------------|-----------------------|------------------|-----------------------------------------------------------------|------------------------------------------|---------------------------------------------------------|--------------------------------------------------------------------------------------------|
| Shuxia                            | Fu         |                       |                  | The Second Hospital of Hebei Medical University                 | Shijiazhuang, China                      | Site principal investigator                             |                                                                                            |
| Shaomei                           | Li         |                       |                  | The Second Hospital of Hebei Medical University                 | Shijiazhuang, China                      |                                                         |                                                                                            |
| Huaying                           | Pei        |                       |                  | The Second Hospital of Hebei Medical University                 | Shijiazhuang, China                      |                                                         |                                                                                            |
| Limin                             | Zhang      |                       |                  | The Second Hospital of Hebei Medical University                 | Shijiazhuang, China                      |                                                         |                                                                                            |
| Ning                              | Lu         |                       |                  | The Second Hospital of Hebei Medical University                 | Shijiazhuang, China                      |                                                         |                                                                                            |
| Jifang                            | Xu         |                       |                  | The Second Hospital of Hebei Medical University                 | Shijiazhuang, China                      |                                                         |                                                                                            |
| Longyun                           | Xu         |                       |                  | The Second Hospital of Hebei Medical University                 | Shijiazhuang, China                      |                                                         |                                                                                            |
| Qian                              | Yang       |                       |                  | The Second Hospital of Hebei Medical University                 | Shijiazhuang, China                      |                                                         |                                                                                            |
| Jingwei                           | Jin        |                       |                  | The Second Hospital of Hebei Medical University                 | Shijiazhuang, China                      |                                                         |                                                                                            |
| Nan                               | Chen       |                       |                  | Ruijin Hospital, Shanghai Jiatong University School of Medicine | Shanghai, China                          | Site principal investigator                             |                                                                                            |
| Weiming                           | Wang       |                       |                  | Ruijin Hospital, Shanghai Jiatong University School of Medicine | Shanghai, China                          |                                                         |                                                                                            |
| lili                              | Xu         |                       |                  | Ruijin Hospital, Shanghai Jiatong University School of Medicine | Shanghai, China                          |                                                         |                                                                                            |
| Ziru                              | Xia        |                       |                  | Ruijin Hospital, Shanghai Jiatong University School of Medicine | Shanghai, China                          |                                                         |                                                                                            |
| Huan                              | Xu         |                       |                  | Ruijin Hospital, Shanghai Jiatong University School of Medicine | Shanghai, China                          |                                                         |                                                                                            |

## Supplemental Online Content: Nonauthor Collaborators

\*Indicates required information. Only first name, last name, and suffix will appear in PubMed.

| *First Name and Middle Initial(s) | *Last Name | *Suffix (eg, Jr, III) | Academic Degrees | Institution                                                     | Location (city, state/province, country) | Role or Contribution, eg, chair, principal investigator | Group (if more than 1 Group listed in the byline) and/or Subgroup (eg, Steering Committee) |
|-----------------------------------|------------|-----------------------|------------------|-----------------------------------------------------------------|------------------------------------------|---------------------------------------------------------|--------------------------------------------------------------------------------------------|
| Wei                               | Huang      |                       |                  | Ruijin Hospital, Shanghai Jiatong University School of Medicine | Shanghai, China                          |                                                         |                                                                                            |
| Yiwen                             | Mo         |                       |                  | Ruijin Hospital, Shanghai Jiatong University School of Medicine | Shanghai, China                          |                                                         |                                                                                            |
| Weihong                           | Chen       |                       |                  | Ruijin Hospital, Shanghai Jiatong University School of Medicine | Shanghai, China                          |                                                         |                                                                                            |
| Lihua                             | Wang       |                       |                  | The Second Hospital of Shanxi Medical University                | Taiyuan, China                           | Site principal investigator                             |                                                                                            |
| Rongshan                          | Li         |                       |                  | The Second Hospital of Shanxi Medical University                | Taiyuan, China                           | Site principal investigator                             |                                                                                            |
| Shulei                            | Yao        |                       |                  | The Second Hospital of Shanxi Medical University                | Taiyuan, China                           |                                                         |                                                                                            |
| Xiaoxia                           | Li         |                       |                  | The Second Hospital of Shanxi Medical University                | Taiyuan, China                           |                                                         |                                                                                            |
| Zhaohui                           | Ni         |                       |                  | Renji Hospital, Shanghai Jiaotong University School of Medicine | Shanghai, China                          | Site principal investigator                             |                                                                                            |
| Ling                              | Wang       |                       |                  | Renji Hospital, Shanghai Jiaotong University School of Medicine | Shanghai, China                          |                                                         |                                                                                            |
| Leyi                              | Gu         |                       |                  | Renji Hospital, Shanghai Jiaotong University School of Medicine | Shanghai, China                          |                                                         |                                                                                            |
| Huihua                            | Pang       |                       |                  | Renji Hospital, Shanghai Jiaotong University School of Medicine | Shanghai, China                          |                                                         |                                                                                            |
| Yin                               | Zhou       |                       |                  | Renji Hospital, Shanghai Jiaotong University School of Medicine | Shanghai, China                          |                                                         |                                                                                            |



## Supplemental Online Content: Nonauthor Collaborators

\*Indicates required information. Only first name, last name, and suffix will appear in PubMed.

| *First Name and Middle Initial(s) | *Last Name | *Suffix (eg, Jr, III) | Academic Degrees | Institution                                                                                        | Location (city, state/province, country) | Role or Contribution, eg, chair, principal investigator | Group (if more than 1 Group listed in the byline) and/or Subgroup (eg, Steering Committee) |
|-----------------------------------|------------|-----------------------|------------------|----------------------------------------------------------------------------------------------------|------------------------------------------|---------------------------------------------------------|--------------------------------------------------------------------------------------------|
| Yan                               | Jin        |                       |                  | Renji Hospital, Shanghai Jiaotong University School of Medicine                                    | Shanghai, China                          |                                                         |                                                                                            |
| Haitao                            | Zhang      |                       |                  | General Hospital of Eastern Theater Command                                                        | Nanjing, China                           | Site principal investigator                             |                                                                                            |
| Xia                               | Wang       |                       |                  | General Hospital of Eastern Theater Command                                                        | Nanjing, China                           |                                                         |                                                                                            |
| Weibo                             | Le         |                       |                  | General Hospital of Eastern Theater Command                                                        | Nanjing, China                           |                                                         |                                                                                            |
| Jinhua                            | Hou        |                       |                  | General Hospital of Eastern Theater Command                                                        | Nanjing, China                           |                                                         |                                                                                            |
| Xia                               | Song       |                       |                  | General Hospital of Eastern Theater Command                                                        | Nanjing, China                           |                                                         |                                                                                            |
| Ling                              | Zhu        |                       |                  | General Hospital of Eastern Theater Command                                                        | Nanjing, China                           |                                                         |                                                                                            |
| Jinghong                          | Zhao       |                       |                  | Xinqiao Hospital, Third Military Medical University                                                | Chongqing, China                         | Site principal investigator                             |                                                                                            |
| Weiping                           | Hou        |                       |                  | Xinqiao Hospital, Third Military Medical University                                                | Chongqing, China                         |                                                         |                                                                                            |
| Jing                              | Wu         |                       |                  | Xinqiao Hospital, Third Military Medical University                                                | Chongqing, China                         |                                                         |                                                                                            |
| Yu                                | Shi        |                       |                  | Xinqiao Hospital, Third Military Medical University                                                | Chongqing, China                         |                                                         |                                                                                            |
| Jianshe                           | Liu        |                       |                  | Union Hospital Affiliated to Tongji Medical College, Huazhong University of Science and Technology | Wuhan, China                             | Site principal investigator                             |                                                                                            |
| Chun                              | Zhang      |                       |                  | Union Hospital Affiliated to Tongji Medical College, Huazhong University of Science and Technology | Wuhan, China                             |                                                         |                                                                                            |

## Supplemental Online Content: Nonauthor Collaborators

\*Indicates required information. Only first name, last name, and suffix will appear in PubMed.

| *First Name and Middle Initial(s) | *Last Name | *Suffix (eg, Jr, III) | Academic Degrees | Institution                                                                                        | Location (city, state/province, country) | Role or Contribution, eg, chair, principal investigator | Group (if more than 1 Group listed in the byline) and/or Subgroup (eg, Steering Committee) |
|-----------------------------------|------------|-----------------------|------------------|----------------------------------------------------------------------------------------------------|------------------------------------------|---------------------------------------------------------|--------------------------------------------------------------------------------------------|
| Cheng                             | Wan        |                       |                  | Union Hospital Affiliated to Tongji Medical College, Huazhong University of Science and Technology | Wuhan, China                             |                                                         |                                                                                            |
| Shan                              | Chen       |                       |                  | Union Hospital Affiliated to Tongji Medical College, Huazhong University of Science and Technology | Wuhan, China                             |                                                         |                                                                                            |
| Hongyan                           | Zhu        |                       |                  | Union Hospital Affiliated to Tongji Medical College, Huazhong University of Science and Technology | Wuhan, China                             |                                                         |                                                                                            |
| Fang                              | Tang       |                       |                  | Union Hospital Affiliated to Tongji Medical College, Huazhong University of Science and Technology | Wuhan, China                             |                                                         |                                                                                            |
| Hui                               | Li         |                       |                  | Union Hospital Affiliated to Tongji Medical College, Huazhong University of Science and Technology | Wuhan, China                             |                                                         |                                                                                            |
| Xuan                              | Jiang      |                       |                  | Union Hospital Affiliated to Tongji Medical College, Huazhong University of Science and Technology | Wuhan, China                             |                                                         |                                                                                            |
| Mei                               | Wang       |                       |                  | Peking University People's Hospital                                                                | Beijing, China                           | Site principal investigator                             |                                                                                            |
| Li                                | Zuo        |                       |                  | Peking University People's Hospital                                                                | Beijing, China                           |                                                         |                                                                                            |
| Yu                                | Yan        |                       |                  | Peking University People's Hospital                                                                | Beijing, China                           |                                                         |                                                                                            |
| Bao                               | Dong       |                       |                  | Peking University People's Hospital                                                                | Beijing, China                           |                                                         |                                                                                            |

## Supplemental Online Content: Nonauthor Collaborators

\*Indicates required information. Only first name, last name, and suffix will appear in PubMed.

| *First Name and Middle Initial(s) | *Last Name | *Suffix (eg, Jr, III) | Academic Degrees | Institution                                                              | Location (city, state/province, country) | Role or Contribution, eg, chair, principal investigator | Group (if more than 1 Group listed in the byline) and/or Subgroup (eg, Steering Committee) |
|-----------------------------------|------------|-----------------------|------------------|--------------------------------------------------------------------------|------------------------------------------|---------------------------------------------------------|--------------------------------------------------------------------------------------------|
| Yina                              | Wang       |                       |                  | Peking University People's Hospital                                      | Beijing, China                           |                                                         |                                                                                            |
| Xuan                              | Zhang      |                       |                  | Peking University People's Hospital                                      | Beijing, China                           |                                                         |                                                                                            |
| Li                                | Bai        |                       |                  | Peking University People's Hospital                                      | Beijing, China                           |                                                         |                                                                                            |
| Peng                              | Li         |                       |                  | Yantai Yuhuangding Hospital                                              | Yantai, China                            | Site principal investigator                             |                                                                                            |
| Dong                              | Qi         |                       |                  | Yantai Yuhuangding Hospital                                              | Yantai, China                            |                                                         |                                                                                            |
| Zhiying                           | Cai        |                       |                  | Yantai Yuhuangding Hospital                                              | Yantai, China                            |                                                         |                                                                                            |
| Guisen                            | Li         |                       |                  | Sichuan Academy of Medical Science, Sichuan Provincial People's Hospital | Chengdu, Sichuan, China                  | Site principal investigator                             |                                                                                            |
| Li                                | Wang       |                       |                  | Sichuan Academy of Medical Science, Sichuan Provincial People's Hospital | Chengdu, Sichuan, China                  |                                                         |                                                                                            |
| Kung                              | Peng       |                       |                  | Sichuan Academy of Medical Science, Sichuan Provincial People's Hospital | Chengdu, Sichuan, China                  |                                                         |                                                                                            |
| Daqing                            | Hong       |                       |                  | Sichuan Academy of Medical Science, Sichuan Provincial People's Hospital | Chengdu, Sichuan, China                  |                                                         |                                                                                            |
| Daqing                            | Yao        |                       |                  | Sichuan Academy of Medical Science, Sichuan Provincial People's Hospital | Chengdu, Sichuan, China                  |                                                         |                                                                                            |
| Aihua                             | Jiang      |                       |                  | Sichuan Academy of Medical Science, Sichuan Provincial People's Hospital | Chengdu, Sichuan, China                  |                                                         |                                                                                            |
| Qiong                             | Luo        |                       |                  | Peking University Shenzhen Hospital                                      | Shenzhen, China                          | Site principal investigator                             |                                                                                            |
| Shuang                            | Hou        |                       |                  | Peking University Shenzhen Hospital                                      | Shenzhen, China                          |                                                         |                                                                                            |
| Fan                               | Zhang      |                       |                  | Peking University Shenzhen Hospital                                      | Shenzhen, China                          |                                                         |                                                                                            |

## Supplemental Online Content: Nonauthor Collaborators

\*Indicates required information. Only first name, last name, and suffix will appear in PubMed.

| *First Name and Middle Initial(s) | *Last Name | *Suffix (eg, Jr, III) | Academic Degrees | Institution                                                                     | Location (city, state/province, country) | Role or Contribution, eg, chair, principal investigator | Group (if more than 1 Group listed in the byline and/or Subgroup (eg, Steering Committee)) |
|-----------------------------------|------------|-----------------------|------------------|---------------------------------------------------------------------------------|------------------------------------------|---------------------------------------------------------|--------------------------------------------------------------------------------------------|
| Lei                               | Zheng      |                       |                  | Peking University Shenzhen Hospital                                             | Shenzhen, China                          |                                                         |                                                                                            |
| Yuanchang                         | Luo        |                       |                  | Peking University Shenzhen Hospital                                             | Shenzhen, China                          |                                                         |                                                                                            |
| Guangyan                          | Cai        |                       |                  | Chinese PLA General Hospital (301 Hospital)                                     | Beijing, China                           | Site principal investigator                             |                                                                                            |
| Shuwei                            | Duan       |                       |                  | Chinese PLA General Hospital (301 Hospital)                                     | Beijing, China                           |                                                         |                                                                                            |
| Yan                               | Zhang      |                       |                  | Chinese PLA General Hospital (301 Hospital)                                     | Beijing, China                           |                                                         |                                                                                            |
| Shuang                            | Liang      |                       |                  | Chinese PLA General Hospital (301 Hospital)                                     | Beijing, China                           |                                                         |                                                                                            |
| Xiaolei                           | Shao       |                       |                  | Chinese PLA General Hospital (301 Hospital)                                     | Beijing, China                           |                                                         |                                                                                            |
| Rong                              | Wang       |                       |                  | Shandong Provincial Hospital                                                    | Shangdong, China                         | Site principal investigator                             |                                                                                            |
| Xiang                             | Liu        |                       |                  | Shandong Provincial Hospital                                                    | Shangdong, China                         |                                                         |                                                                                            |
| Ying                              | Xu         |                       |                  | Shandong Provincial Hospital                                                    | Shangdong, China                         |                                                         |                                                                                            |
| Jing                              | Zhang      |                       |                  | Shandong Provincial Hospital                                                    | Shangdong, China                         |                                                         |                                                                                            |
| Jianghua                          | Chen       |                       |                  | The First Affiliated Hospital, Zhejiang University School of Medicine, Hangzhou | Hangzhou, China                          | Site principal investigator                             |                                                                                            |
| Jun                               | Cheng      |                       |                  | The First Affiliated Hospital, Zhejiang University School of Medicine, Hangzhou | Hangzhou, China                          |                                                         |                                                                                            |
| Lingfei                           | Zhao       |                       |                  | The First Affiliated Hospital, Zhejiang University School of Medicine, Hangzhou | Hangzhou, China                          |                                                         |                                                                                            |
| Xiaoying                          | Du         |                       |                  | The First Affiliated Hospital, Zhejiang University School of Medicine, Hangzhou | Hangzhou, China                          |                                                         |                                                                                            |

## Supplemental Online Content: Nonauthor Collaborators

\*Indicates required information. Only first name, last name, and suffix will appear in PubMed.

| *First Name and Middle Initial(s) | *Last Name | *Suffix (eg, Jr, III) | Academic Degrees | Institution                                                 | Location (city, state/province, country) | Role or Contribution, eg, chair, principal investigator | Group (if more than 1 Group listed in the byline and/or Subgroup (eg, Steering Committee)) |
|-----------------------------------|------------|-----------------------|------------------|-------------------------------------------------------------|------------------------------------------|---------------------------------------------------------|--------------------------------------------------------------------------------------------|
| Hongyu                            | Chen       |                       |                  | Hangzhou Hospital of Traditional Chinese Medicine, Hangzhou | Hangzhou, China                          |                                                         |                                                                                            |
| Bin                               | Zhu        |                       |                  | Hangzhou Hospital of Traditional Chinese Medicine, Hangzhou | Hangzhou, China                          |                                                         |                                                                                            |
| Weili                             | Pan        |                       |                  | Hangzhou Hospital of Traditional Chinese Medicine, Hangzhou | Hangzhou, China                          |                                                         |                                                                                            |
| Yalong                            | Ma         |                       |                  | Hangzhou Hospital of Traditional Chinese Medicine, Hangzhou | Hangzhou, China                          |                                                         |                                                                                            |
| Chenmin                           | Cui        |                       |                  | Hangzhou Hospital of Traditional Chinese Medicine, Hangzhou | Hangzhou, China                          |                                                         |                                                                                            |
| Qingxiao                          | Zhang      |                       |                  | Hangzhou Hospital of Traditional Chinese Medicine, Hangzhou | Hangzhou, China                          |                                                         |                                                                                            |
| Jiawei                            | Zhang      |                       |                  | Hangzhou Hospital of Traditional Chinese Medicine, Hangzhou | Hangzhou, China                          |                                                         |                                                                                            |
| Ping                              | Fu         |                       |                  | West China Hospital, Sichuan University, Chengdu            | Chengdu, China                           | Site principal investigator                             |                                                                                            |
| Xi                                | Tang       |                       |                  | West China Hospital, Sichuan University, Chengdu            | Chengdu, China                           |                                                         |                                                                                            |
| Wei                               | Qin        |                       |                  | West China Hospital, Sichuan University, Chengdu            | Chengdu, China                           |                                                         |                                                                                            |
| Yaping                            | Liang      |                       |                  | West China Hospital, Sichuan University, Chengdu            | Chengdu, China                           |                                                         |                                                                                            |
| Detian                            | Li         |                       |                  | Shengjing Hospital of China Medical University, Shenyang    | Shenyang, China                          | Site principal investigator                             |                                                                                            |
| Guangping                         | Sun        |                       |                  | Shengjing Hospital of China Medical University, Shenyang    | Shenyang, China                          |                                                         |                                                                                            |

## Supplemental Online Content: Nonauthor Collaborators

\*Indicates required information. Only first name, last name, and suffix will appear in PubMed.

| *First Name and Middle Initial(s) | *Last Name | *Suffix (eg, Jr, III) | Academic Degrees | Institution                                                       | Location (city, state/province, country) | Role or Contribution, eg, chair, principal investigator | Group (if more than 1 Group listed in the byline) and/or Subgroup (eg, Steering Committee) |
|-----------------------------------|------------|-----------------------|------------------|-------------------------------------------------------------------|------------------------------------------|---------------------------------------------------------|--------------------------------------------------------------------------------------------|
| Xiaoxiao                          | Su         |                       |                  | Shengjing Hospital of China Medical University, Shenyang          | Shenyang, China                          |                                                         |                                                                                            |
| Baixue                            | Zhao       |                       |                  | Shengjing Hospital of China Medical University, Shenyang          | Shenyang, China                          |                                                         |                                                                                            |
| Qiang                             | He         |                       |                  | Zhejiang Provincial People's Hospital, Hangzhou                   | Hangzhou, China                          | Site principal investigator                             |                                                                                            |
| Xiaogang                          | Shen       |                       |                  | Zhejiang Provincial People's Hospital, Hangzhou                   | Hangzhou, China                          |                                                         |                                                                                            |
| Danna                             | Zheng      |                       |                  | Zhejiang Provincial People's Hospital, Hangzhou                   | Hangzhou, China                          |                                                         |                                                                                            |
| Yi                                | Sun        |                       |                  | Central Hospital Affiliated to Shenyang Medical College, Shenyang | Shenyang, China                          | Site principal investigator                             |                                                                                            |
| Hua                               | Zheng      |                       |                  | Central Hospital Affiliated to Shenyang Medical College, Shenyang | Shenyang, China                          |                                                         |                                                                                            |
| Wei                               | Zheng      |                       |                  | Central Hospital Affiliated to Shenyang Medical College, Shenyang | Shenyang, China                          |                                                         |                                                                                            |
| Fuming                            | Lu         |                       |                  | Huashan Hospital, Medical Centre of Fudan University, Shanghai    | Shanghai, China                          | Site principal investigator                             |                                                                                            |
| Lingyun                           | Lai        |                       |                  | Huashan Hospital, Medical Centre of Fudan University, Shanghai    | Shanghai, China                          |                                                         |                                                                                            |
| Minmin                            | Zhang      |                       |                  | Huashan Hospital, Medical Centre of Fudan University, Shanghai    | Shanghai, China                          |                                                         |                                                                                            |
| Ningxin                           | Xu         |                       |                  | Huashan Hospital, Medical Centre of Fudan University, Shanghai    | Shanghai, China                          |                                                         |                                                                                            |

## Supplemental Online Content: Nonauthor Collaborators

\*Indicates required information. Only first name, last name, and suffix will appear in PubMed.

| *First Name and Middle Initial(s) | *Last Name | *Suffix (eg, Jr, III) | Academic Degrees | Institution                                                                                                        | Location (city, state/province, country) | Role or Contribution, eg, chair, principal investigator | Group (if more than 1 Group listed in the byline) and/or Subgroup (eg, Steering Committee) |
|-----------------------------------|------------|-----------------------|------------------|--------------------------------------------------------------------------------------------------------------------|------------------------------------------|---------------------------------------------------------|--------------------------------------------------------------------------------------------|
| Huizhu                            | Shi        |                       |                  | Huashan Hospital, Medical Centre of Fudan University, Shanghai                                                     | Shanghai, China                          |                                                         |                                                                                            |
| Wangsheng                         | Chen       |                       |                  | Huashan Hospital, Medical Centre of Fudan University, Shanghai                                                     | Shanghai, China                          |                                                         |                                                                                            |
| Xinling                           | Liang      |                       |                  | Guangdong Provincial People's Hospital, Guangzhou                                                                  | Guangzhou, China                         | Site principal investigator                             |                                                                                            |
| Zhiming                           | Ye         |                       |                  | Guangdong Provincial People's Hospital, Guangzhou                                                                  | Guangzhou, China                         |                                                         |                                                                                            |
| Lixia                             | Xu         |                       |                  | Guangdong Provincial People's Hospital, Guangzhou                                                                  | Guangzhou, China                         |                                                         |                                                                                            |
| Ruijing                           | Zhang      |                       |                  | Guangdong Provincial People's Hospital, Guangzhou                                                                  | Guangzhou, China                         |                                                         |                                                                                            |
| Yiming                            | Tao        |                       |                  | Guangdong Provincial People's Hospital, Guangzhou                                                                  | Guangzhou, China                         |                                                         |                                                                                            |
| Dongmei                           | Xu         |                       |                  | The First Affiliated Hospital of Shandong First Medical University, Shandong Provincial Qianfoshan Hospital, Jinan | Jinan, China                             | Site principal investigator                             |                                                                                            |
| Lijun                             | Tang       |                       |                  | The First Affiliated Hospital of Shandong First Medical University, Shandong Provincial Qianfoshan Hospital, Jinan | Jinan, China                             |                                                         |                                                                                            |
| Xiuhua                            | Lian       |                       |                  | The First Affiliated Hospital of Shandong First Medical University, Shandong Provincial Qianfoshan Hospital, Jinan | Jinan, China                             |                                                         |                                                                                            |
| Guohua                            | Ding       |                       |                  | Renmin Hospital, Wuhan University, Wuhan                                                                           | Wuhan, China                             | Site principal investigator                             |                                                                                            |
| Huiming                           | Wang       |                       |                  | Renmin Hospital, Wuhan University, Wuhan                                                                           | Wuhan, China                             |                                                         |                                                                                            |
| Lihua                             | Yang       |                       |                  | Renmin Hospital, Wuhan University, Wuhan                                                                           | Wuhan, China                             |                                                         |                                                                                            |

## Supplemental Online Content: Nonauthor Collaborators

\*Indicates required information. Only first name, last name, and suffix will appear in PubMed.

| *First Name and Middle Initial(s) | *Last Name | *Suffix (eg, Jr, III) | Academic Degrees | Institution                                                                          | Location (city, state/province, country) | Role or Contribution, eg, chair, principal investigator | Group (if more than 1 Group listed in the byline) and/or Subgroup (eg, Steering Committee) |
|-----------------------------------|------------|-----------------------|------------------|--------------------------------------------------------------------------------------|------------------------------------------|---------------------------------------------------------|--------------------------------------------------------------------------------------------|
| Zhengkang                         | Li         |                       |                  | Renmin Hospital, Wuhan University, Wuhan                                             | Wuhan, China                             |                                                         |                                                                                            |
| Zhao                              | Hu         |                       |                  | Qilu Hospital of Shandong University, Jinan                                          | Jinan, China                             | Site principal investigator                             |                                                                                            |
| Bei                               | Jiang      |                       |                  | Qilu Hospital of Shandong University, Jinan                                          | Jinan, China                             |                                                         |                                                                                            |
| Zhiling                           | Guo        |                       |                  | The First Affiliated Hospital of Henan University of Science and Technology, Luoyang | Luoyang, China                           | Site principal investigator                             |                                                                                            |
| Jie                               | Chang      |                       |                  | The First Affiliated Hospital of Henan University of Science and Technology, Luoyang | Luoyang, China                           |                                                         |                                                                                            |
| Qingmiao                          | Wang       |                       |                  | The First Affiliated Hospital of Henan University of Science and Technology, Luoyang | Luoyang, China                           |                                                         |                                                                                            |
| Nan                               | Li         |                       |                  | The First Affiliated Hospital of Henan University of Science and Technology, Luoyang | Luoyang, China                           |                                                         |                                                                                            |
| Aiping                            | Zhang      |                       |                  | Jinan Military General Hospital, Jinan                                               | Jinan, China                             | Site principal investigator                             |                                                                                            |
| Shumei                            | Shi        |                       |                  | Jinan Military General Hospital, Jinan                                               | Jinan, China                             |                                                         |                                                                                            |
| Zhen                              | Li         |                       |                  | Jinan Military General Hospital, Jinan                                               | Jinan, China                             |                                                         |                                                                                            |
| Hong                              | Xu         |                       |                  | Jinan Military General Hospital, Jinan                                               | Jinan, China                             |                                                         |                                                                                            |
| Beiyang                           | Bao        |                       |                  | Ningbo Urology & Nephrology Hospital, Ningbo                                         | Ningbo, China                            | Site principal investigator                             |                                                                                            |
| Yu                                | Zhao       |                       |                  | Ningbo Urology & Nephrology Hospital, Ningbo                                         | Ningbo, China                            |                                                         |                                                                                            |
| Zhuan                             | Nie        |                       |                  | Ningbo Urology & Nephrology Hospital, Ningbo                                         | Ningbo, China                            |                                                         |                                                                                            |



## Supplemental Online Content: Nonauthor Collaborators

\*Indicates required information. Only first name, last name, and suffix will appear in PubMed.

| *First Name and Middle Initial(s) | *Last Name | *Suffix (eg, Jr, III) | Academic Degrees | Institution                                                  | Location (city, state/province, country) | Role or Contribution, eg, chair, principal investigator | Group (if more than 1 Group listed in the byline) and/or Subgroup (eg, Steering Committee) |
|-----------------------------------|------------|-----------------------|------------------|--------------------------------------------------------------|------------------------------------------|---------------------------------------------------------|--------------------------------------------------------------------------------------------|
| Ting                              | Liu        |                       |                  | Ningbo Urology & Nephrology Hospital, Ningbo                 | Ningbo, China                            |                                                         |                                                                                            |
| Yue                               | Wang       |                       |                  | Peking University Third Hospital, Beijing                    | Beijing, China                           | Site principal investigator                             |                                                                                            |
| Zhen                              | Cui        |                       |                  | Peking University Third Hospital, Beijing                    | Beijing, China                           |                                                         |                                                                                            |
| Chunyan                           | Su         |                       |                  | Peking University Third Hospital, Beijing                    | Beijing, China                           |                                                         |                                                                                            |
| Li                                | Gong       |                       |                  | Inner Mongolia People's Hospital, Huhhot                     | Huhhot, China                            | Site principal investigator                             |                                                                                            |
| Guoping                           | Liu        |                       |                  | Inner Mongolia People's Hospital, Huhhot                     | Huhhot, China                            |                                                         |                                                                                            |
| Lei                               | Yu         |                       |                  | Inner Mongolia People's Hospital, Huhhot                     | Huhhot, China                            |                                                         |                                                                                            |
| Bo                                | Wang       |                       |                  | Inner Mongolia People's Hospital, Huhhot                     | Huhhot, China                            |                                                         |                                                                                            |
| Dan                               | Xu         |                       |                  | Inner Mongolia People's Hospital, Huhhot                     | Huhhot, China                            |                                                         |                                                                                            |
| Ying                              | Li         |                       |                  | The Third Hospital of Hebei Medical University, Shijiazhuang | Shijiazhuang, China                      | Site principal investigator                             |                                                                                            |
| Qiongzhen                         | Lin        |                       |                  | The Third Hospital of Hebei Medical University, Shijiazhuang | Shijiazhuang, China                      |                                                         |                                                                                            |
| Ke                                | Yu         |                       |                  | The Third Hospital of Hebei Medical University, Shijiazhuang | Shijiazhuang, China                      |                                                         |                                                                                            |
| Yipu                              | Shen       |                       |                  | Beijing Anzhen Hospital, Capital Medical University, Beijing | Beijing, China                           | Site principal investigator                             |                                                                                            |
| Hong                              | Cheng      |                       |                  | Beijing Anzhen Hospital, Capital Medical University, Beijing | Beijing, China                           |                                                         |                                                                                            |

## Supplemental Online Content: Nonauthor Collaborators

\*Indicates required information. Only first name, last name, and suffix will appear in PubMed.

| *First Name and Middle Initial(s) | *Last Name | *Suffix (eg, Jr, III) | Academic Degrees | Institution                                                                                 | Location (city, state/province, country) | Role or Contribution, eg, chair, principal investigator | Group (if more than 1 Group listed in the byline) and/or Subgroup (eg, Steering Committee) |
|-----------------------------------|------------|-----------------------|------------------|---------------------------------------------------------------------------------------------|------------------------------------------|---------------------------------------------------------|--------------------------------------------------------------------------------------------|
| Xiaoyi                            | Xu         |                       |                  | Beijing Anzhen Hospital, Capital Medical University, Beijing                                | Beijing, China                           |                                                         |                                                                                            |
| Yu                                | Wang       |                       |                  | Beijing Anzhen Hospital, Capital Medical University, Beijing                                | Beijing, China                           |                                                         |                                                                                            |
| Rong                              | Liu        |                       |                  | Beijing Anzhen Hospital, Capital Medical University, Beijing                                | Beijing, China                           |                                                         |                                                                                            |
| Gang                              | Xu         |                       |                  | Tongji Hospital, Tongji Medical College, Huazhong University of Science & Technology, Wuhan | Wuhan, China                             | Site principal investigator                             |                                                                                            |
| Min                               | Han        |                       |                  | Tongji Hospital, Tongji Medical College, Huazhong University of Science & Technology, Wuhan | Wuhan, China                             |                                                         |                                                                                            |
| Le                                | Wang       |                       |                  | Tongji Hospital, Tongji Medical College, Huazhong University of Science & Technology, Wuhan | Wuhan, China                             |                                                         |                                                                                            |
| Changying                         | Xing       |                       |                  | The First Affiliated Hospital with Nanjing Medical University, Nanjing                      | Nanjing, China                           | Site principal investigator                             |                                                                                            |
| Chengning                         | Zhang      |                       |                  | The First Affiliated Hospital with Nanjing Medical University, Nanjing                      | Nanjing, China                           |                                                         |                                                                                            |
| Zhiming                           | Huang      |                       |                  | The First Affiliated Hospital with Nanjing Medical University, Nanjing                      | Nanjing, China                           |                                                         |                                                                                            |
| Guang                             | Yang       |                       |                  | The First Affiliated Hospital with Nanjing Medical University, Nanjing                      | Nanjing, China                           |                                                         |                                                                                            |

## Supplemental Online Content: Nonauthor Collaborators

\*Indicates required information. Only first name, last name, and suffix will appear in PubMed.

| *First Name and Middle Initial(s) | *Last Name | *Suffix (eg, Jr, III) | Academic Degrees | Institution                                                                     | Location (city, state/province, country) | Role or Contribution, eg, chair, principal investigator | Group (if more than 1 Group listed in the byline) and/or Subgroup (eg, Steering Committee) |
|-----------------------------------|------------|-----------------------|------------------|---------------------------------------------------------------------------------|------------------------------------------|---------------------------------------------------------|--------------------------------------------------------------------------------------------|
| Xueqiang                          | Xu         |                       |                  | The First Affiliated Hospital with Nanjing Medical University, Nanjing          | Nanjing, China                           |                                                         |                                                                                            |
| Xiaolin                           | Lv         |                       |                  | The First Affiliated Hospital with Nanjing Medical University, Nanjing          | Nanjing, China                           |                                                         |                                                                                            |
| Huiping                           | Hong       |                       |                  | The First Affiliated Hospital with Nanjing Medical University, Nanjing          | Nanjing, China                           |                                                         |                                                                                            |
| Bing                              | Liu        |                       |                  | Henan Provincial People's Hospital, Zhengzhou                                   | Zhengzhou, China                         | Site principal investigator                             |                                                                                            |
| Lin                               | Tao        |                       |                  | Henan Provincial People's Hospital, Zhengzhou                                   | Zhengzhou, China                         |                                                         |                                                                                            |
| Xiaoxuan                          | Zhang      |                       |                  | Jilin Province FAW General Hospital Jilin University Fourth Hospital, Changchun | Changchun, China                         | Site principal investigator                             |                                                                                            |
| Huijie                            | Yang       |                       |                  | Jilin Province FAW General Hospital Jilin University Fourth Hospital, Changchun | Changchun, China                         |                                                         |                                                                                            |
| Xiaochun                          | Yang       |                       |                  |                                                                                 |                                          |                                                         |                                                                                            |
| Xiaodong                          | Zhang      |                       |                  | Jilin Province FAW General Hospital Jilin University Fourth Hospital, Changchun | Changchun, China                         |                                                         |                                                                                            |
| H                                 | Yang       |                       |                  | Jilin Province FAW General Hospital Jilin University Fourth Hospital, Changchun |                                          |                                                         |                                                                                            |
| Yonghui                           | Mao        |                       |                  | Beijing Hospital, Beijing                                                       | Beijing, China                           | Site principal investigator                             |                                                                                            |
| Hua                               | Wu         |                       |                  | Beijing Hospital, Beijing                                                       | Beijing, China                           |                                                         |                                                                                            |
| Tianhui                           | Li         |                       |                  | Beijing Hospital, Beijing                                                       | Beijing, China                           |                                                         |                                                                                            |
| Haitao                            | Wang       |                       |                  | Beijing Hospital, Beijing                                                       | Beijing, China                           |                                                         |                                                                                            |
| Ban                               | Zhao       |                       |                  | Beijing Hospital, Beijing                                                       | Beijing, China                           |                                                         |                                                                                            |

## Supplemental Online Content: Nonauthor Collaborators

\*Indicates required information. Only first name, last name, and suffix will appear in PubMed.

| *First Name and Middle Initial(s) | *Last Name    | *Suffix (eg, Jr, III) | Academic Degrees | Institution                                                        | Location (city, state/province, country) | Role or Contribution, eg, chair, principal investigator | Group (if more than 1 Group listed in the byline and/or Subgroup (eg, Steering Committee)) |
|-----------------------------------|---------------|-----------------------|------------------|--------------------------------------------------------------------|------------------------------------------|---------------------------------------------------------|--------------------------------------------------------------------------------------------|
| Hongli                            | Lin           |                       |                  | The First Affiliated Hospital of Dalian Medical University, Dalian | Dalian, China                            | Site principal investigator                             |                                                                                            |
| Ning                              | Yang          |                       |                  | The First Affiliated Hospital of Dalian Medical University, Dalian | Dalian, China                            |                                                         |                                                                                            |
| K Samuel                          | Fung          |                       |                  | Princess Margaret Hospital, Kowloon, Hong Kong                     | Hong Kong, China                         | Site principal investigator                             |                                                                                            |
| R                                 | Chan          |                       |                  | Princess Margaret Hospital, Kowloon, Hong Kong                     | Hong Kong, China                         |                                                         |                                                                                            |
| Rebecca                           | Law           |                       |                  | Princess Margaret Hospital, Kowloon, Hong Kong                     | Hong Kong, China                         |                                                         |                                                                                            |
| Sreelatha                         | Melemadathil  |                       |                  | Calicut Medical College, Kerala                                    | Kerala, India                            | Site principal investigator                             |                                                                                            |
| Hijaz                             | PT            |                       |                  | Calicut Medical College, Kerala                                    | Kerala, India                            |                                                         |                                                                                            |
| Rahila                            | Razak         |                       |                  | Calicut Medical College, Kerala                                    | Kerala, India                            |                                                         |                                                                                            |
| K C                               | Sinta         |                       |                  | Calicut Medical College, Kerala                                    | Kerala, India                            |                                                         |                                                                                            |
| Gopalakrishnan                    | Natarajan     |                       |                  | Madras Medical College, Chennai                                    | Chennai, India                           | Site principal investigator                             |                                                                                            |
| Junaith                           | Mohammed      |                       |                  | Madras Medical College, Chennai                                    | Chennai, India                           |                                                         |                                                                                            |
| Dinesh K                          | Thanigachalam |                       |                  | Madras Medical College, Chennai                                    | Chennai, India                           |                                                         |                                                                                            |
| Sreebhusan R                      | Devaraju      |                       |                  | Nizam`s Institute of Medical Sciences, Hyderabad                   | Hyderabad, India                         | Site principal investigator                             |                                                                                            |
| Satheesh Reddy                    | Alavala       |                       |                  | Nizam`s Institute of Medical Sciences, Hyderabad                   | Hyderabad, India                         |                                                         |                                                                                            |
| Anvesh                            | Golla         |                       |                  | Nizam`s Institute of Medical Sciences, Hyderabad                   | Hyderabad, India                         |                                                         |                                                                                            |
| Vamsi                             | Nagalla       |                       |                  | Nizam`s Institute of Medical Sciences, Hyderabad                   | Hyderabad, India                         |                                                         |                                                                                            |
| Raju                              | Nallagasu     |                       |                  | Nizam`s Institute of Medical Sciences, Hyderabad                   | Hyderabad, India                         |                                                         |                                                                                            |

## Supplemental Online Content: Nonauthor Collaborators

\*Indicates required information. Only first name, last name, and suffix will appear in PubMed.

| *First Name and Middle Initial(s) | *Last Name   | *Suffix (eg, Jr, III) | Academic Degrees | Institution                                                          | Location (city, state/province, country) | Role or Contribution, eg, chair, principal investigator | Group (if more than 1 Group listed in the byline) and/or Subgroup (eg, Steering Committee) |
|-----------------------------------|--------------|-----------------------|------------------|----------------------------------------------------------------------|------------------------------------------|---------------------------------------------------------|--------------------------------------------------------------------------------------------|
| Manisha                           | Sahay        |                       |                  | Osmania General Hospital, Hyderabad                                  | Hyderabad, India                         | Site principal investigator                             |                                                                                            |
| Sravani                           | Borra        |                       |                  | Osmania General Hospital, Hyderabad                                  | Hyderabad, India                         |                                                         |                                                                                            |
| Rakesh                            | Sahay        |                       |                  | Osmania General Hospital, Hyderabad                                  | Hyderabad, India                         |                                                         |                                                                                            |
| LV Krishna Suri                   | Dasyam       |                       |                  | Osmania General Hospital, Hyderabad                                  | Hyderabad, India                         |                                                         |                                                                                            |
| Mounika                           | Kumbagiri    |                       |                  | Osmania General Hospital, Hyderabad                                  | Hyderabad, India                         |                                                         |                                                                                            |
| Prasad                            | MSLN         |                       |                  | Osmania General Hospital, Hyderabad                                  | Hyderabad, India                         |                                                         |                                                                                            |
| Arfa                              | Nazneen      |                       |                  | Osmania General Hospital, Hyderabad                                  | Hyderabad, India                         |                                                         |                                                                                            |
| KVL                               | Prathyusha   |                       |                  | Osmania General Hospital, Hyderabad                                  | Hyderabad, India                         |                                                         |                                                                                            |
| Raja                              | Ramachandran |                       |                  | Postgraduate Institute of Medical Education and Research, Chandigarh | Chandigarh, India                        | Site principal investigator                             |                                                                                            |
| Krishan L                         | Gupta        |                       |                  | Postgraduate Institute of Medical Education and Research, Chandigarh | Chandigarh, India                        |                                                         |                                                                                            |
| Thakaur                           | Sain         |                       |                  | Postgraduate Institute of Medical Education and Research, Chandigarh | Chandigarh, India                        |                                                         |                                                                                            |
| Narayan                           | Prasad       |                       |                  | Sanjay Gandhi Post Graduate Institute of Medical Science, Lucknow    | Lucknow, India                           | Site principal investigator                             |                                                                                            |
| Dharmendra S                      | Bhaduria     |                       |                  | Sanjay Gandhi Post Graduate Institute of Medical Science, Lucknow    | Lucknow, India                           |                                                         |                                                                                            |

\*Indicates required information. Only first name, last name, and suffix will appear in PubMed.

| *First Name and Middle Initial(s) | *Last Name  | *Suffix (eg, Jr, III) | Academic Degrees | Institution                                                       | Location (city, state/province, country) | Role or Contribution, eg, chair, principal investigator | Group (if more than 1 Group listed in the byline) and/or Subgroup (eg, Steering Committee) |
|-----------------------------------|-------------|-----------------------|------------------|-------------------------------------------------------------------|------------------------------------------|---------------------------------------------------------|--------------------------------------------------------------------------------------------|
| Ashok K                           | Pandy       |                       |                  | Sanjay Gandhi Post Graduate Institute of Medical Science, Lucknow | Lucknow, India                           |                                                         |                                                                                            |
| Pratik                            | Singh       |                       |                  | Sanjay Gandhi Post Graduate Institute of Medical Science, Lucknow | Lucknow, India                           |                                                         |                                                                                            |
| Mohamad Z                         | Abdul Wahab |                       |                  | Hospital Kuala Lumpur, Kuala Lumpur                               | Kuala Lumpur, Malaysia                   | Site principal investigator                             |                                                                                            |
| Zurina                            | Che Rohani  |                       |                  | Hospital Kuala Lumpur, Kuala Lumpur                               | Kuala Lumpur, Malaysia                   |                                                         |                                                                                            |
| Haiyuni                           | Mohd Yassim |                       |                  | Hospital Kuala Lumpur, Kuala Lumpur                               | Kuala Lumpur, Malaysia                   |                                                         |                                                                                            |
| Siti Nur Omaira                   | Razali      |                       |                  | Hospital Kuala Lumpur, Kuala Lumpur                               | Kuala Lumpur, Malaysia                   |                                                         |                                                                                            |
| Norhaslinda                       | Saaidi      |                       |                  | Hospital Kuala Lumpur, Kuala Lumpur                               | Kuala Lumpur, Malaysia                   |                                                         |                                                                                            |
| Wan Mohamad                       | Wan Hazlina |                       |                  | Hospital Kuala Lumpur, Kuala Lumpur                               | Kuala Lumpur, Malaysia                   |                                                         |                                                                                            |
| Rosnawati                         | Yahya       |                       |                  | Hospital Kuala Lumpur, Kuala Lumpur                               | Kuala Lumpur, Malaysia                   |                                                         |                                                                                            |
| Seow Yeing                        | Yee         |                       |                  | Hospital Kuala Lumpur, Kuala Lumpur                               | Kuala Lumpur, Malaysia                   |                                                         |                                                                                            |
| Nurul                             | Zaynah      |                       |                  | Hospital Kuala Lumpur, Kuala Lumpur                               | Kuala Lumpur, Malaysia                   |                                                         |                                                                                            |
| Nurul Hizwani                     | Azahar      |                       |                  | Hospital Kuala Lumpur, Kuala Lumpur                               | Kuala Lumpur, Malaysia                   |                                                         |                                                                                            |
| Hui Foong                         | Tan         |                       |                  | Hospital Kuala Lumpur, Kuala Lumpur                               | Kuala Lumpur, Malaysia                   |                                                         |                                                                                            |
| Chek Loong                        | Loh         |                       |                  | Hospital Raja Permaisuri Bainun, Ipoh                             | Ipoh, Malaysia                           | Site principal investigator                             |                                                                                            |
| Saliza                            | Hashim      |                       |                  | Hospital Raja Permaisuri Bainun, Ipoh                             | Ipoh, Malaysia                           |                                                         |                                                                                            |

## Supplemental Online Content: Nonauthor Collaborators

\*Indicates required information. Only first name, last name, and suffix will appear in PubMed.

| *First Name and Middle Initial(s) | *Last Name  | *Suffix (eg, Jr, III) | Academic Degrees | Institution                                       | Location (city, state/province, country) | Role or Contribution, eg, chair, principal investigator | Group (if more than 1 Group listed in the byline) and/or Subgroup (eg, Steering Committee) |
|-----------------------------------|-------------|-----------------------|------------------|---------------------------------------------------|------------------------------------------|---------------------------------------------------------|--------------------------------------------------------------------------------------------|
| Yee Yan                           | Lee         |                       |                  | Hospital Raja Permaisuri Bainun, Ipoh             | Ipoh, Malaysia                           |                                                         |                                                                                            |
| Xin Jie                           | Lim         |                       |                  | Hospital Raja Permaisuri Bainun, Ipoh             | Ipoh, Malaysia                           |                                                         |                                                                                            |
| Norlia                            | Mohd Khairi |                       |                  | Hospital Raja Permaisuri Bainun, Ipoh             | Ipoh, Malaysia                           |                                                         |                                                                                            |
| Sridhar                           | Ramanaidu   |                       |                  | Hospital Raja Permaisuri Bainun, Ipoh             | Ipoh, Malaysia                           |                                                         |                                                                                            |
| Kah Mean                          | Thong       |                       |                  | Hospital Raja Permaisuri Bainun, Ipoh             | Ipoh, Malaysia                           |                                                         |                                                                                            |
| Wen Jiun                          | Liu         |                       |                  | Hospital Sultanah Aminah, Johor                   | Johor Bahru, Johor, Malaysia             | Site principal investigator                             |                                                                                            |
| Lik Wee                           | Ee          |                       |                  | Hospital Sultanah Aminah, Johor                   | Johor Bahru, Johor, Malaysia             |                                                         |                                                                                            |
| Yuana                             | Mohd Yusoff |                       |                  | Hospital Sultanah Aminah, Johor                   | Johor Bahru, Johor, Malaysia             |                                                         |                                                                                            |
| Laura Lui Sian                    | Ngu         |                       |                  | Hospital Umum Sarawak, Kuching                    | Kuching, Sarawak, Malaysia               | Site principal investigator                             |                                                                                            |
| Nyuk Suan                         | Chai        |                       |                  | Hospital Umum Sarawak, Kuching                    | Kuching, Sarawak, Malaysia               |                                                         |                                                                                            |
| Lawrence Wei Soon                 | Hii         |                       |                  | Hospital Umum Sarawak, Kuching                    | Kuching, Sarawak, Malaysia               |                                                         |                                                                                            |
| Clare Hui Hong                    | Tan         |                       |                  | Hospital Umum Sarawak, Kuching                    | Kuching, Sarawak, Malaysia               |                                                         |                                                                                            |
| Sharifah Hatijah                  | Wan Japar   |                       |                  | Hospital Umum Sarawak, Kuching                    | Kuching, Sarawak, Malaysia               |                                                         |                                                                                            |
| Lily                              | Mushahar    |                       |                  | Hospital Tuanku Ja'afar Seremban, Negeri Sembilan | Seremban, Negeri Sembilan, Malaysia      | Site principal investigator                             |                                                                                            |
| Siti Hawa                         | Md Yusuff   |                       |                  | Hospital Tuanku Ja'afar Seremban, Negeri Sembilan | Seremban, Negeri Sembilan, Malaysia      |                                                         |                                                                                            |
| Maisarah                          | Noor        |                       |                  | Hospital Tuanku Ja'afar Seremban, Negeri Sembilan | Seremban, Negeri Sembilan, Malaysia      |                                                         |                                                                                            |

## Supplemental Online Content: Nonauthor Collaborators

\*Indicates required information. Only first name, last name, and suffix will appear in PubMed.

| *First Name and Middle Initial(s) | *Last Name   | *Suffix (eg, Jr, III) | Academic Degrees | Institution                                                                                                                                                                          | Location (city, state/province, country) | Role or Contribution, eg, chair, principal investigator | Group (if more than 1 Group listed in the byline and/or Subgroup (eg, Steering Committee)) |
|-----------------------------------|--------------|-----------------------|------------------|--------------------------------------------------------------------------------------------------------------------------------------------------------------------------------------|------------------------------------------|---------------------------------------------------------|--------------------------------------------------------------------------------------------|
| Kok Peng                          | Ng           |                       |                  | University of Malaya Medical Centre, Kuala Lumpur                                                                                                                                    | Kuala Lumpur, Malaysia                   | Site principal investigator                             |                                                                                            |
| Soo Kun                           | Lim          |                       |                  | University of Malaya Medical Centre, Kuala Lumpur                                                                                                                                    | Kuala Lumpur, Malaysia                   |                                                         |                                                                                            |
| Wan Ahmad Faizal Alaidin          | Razali       |                       |                  | University of Malaya Medical Centre, Kuala Lumpur                                                                                                                                    | Kuala Lumpur, Malaysia                   |                                                         |                                                                                            |
| Wan Ahmad Hafiz                   | Wan Md Adnan |                       |                  | University of Malaya Medical Centre, Kuala Lumpur                                                                                                                                    | Kuala Lumpur, Malaysia                   |                                                         |                                                                                            |
| David                             | Jayne        |                       |                  | Department of Medicine, University of Cambridge                                                                                                                                      | Cambridge, United Kingdom                |                                                         | Chair, Independent Data Safety and Monitoring Committee                                    |
| Tom                               | Greene       |                       |                  | Biostatistics Division, Dept. of Population Health Sciences; Epidemiology Division, Dept of Internal Medicine, University of Utah                                                    | UTAH, USA                                |                                                         | Member, Independent Data Safety and Monitoring Committee                                   |
| Michael                           | Walsh        |                       |                  | Medicine and Health Research Methods, Evidence & Impact, McMaster University, Hamilton, Canada; Population Health Research Institute, Hamilton Health Sciences / McMaster University | Hamilton, Canada                         |                                                         | Member, Independent Data Safety and Monitoring Committee                                   |
| Angela Yee-Moon                   | Wang         |                       |                  | Department of Medicine, Queen Mary Hospital, University of Hong Kong                                                                                                                 | Hong Kong, China                         |                                                         | Member, Independent Data Safety and Monitoring Committee                                   |
| Amanda                            | Mather       |                       | PhD              | Royal North Shore Hospital                                                                                                                                                           | St Leonards, Sydney, Australia           |                                                         | Member, Endpoint Adjudication Committee                                                    |



## Supplemental Online Content: Nonauthor Collaborators

\*Indicates required information. Only first name, last name, and suffix will appear in PubMed.

| <b>*First Name and Middle Initial(s)</b> | <b>*Last Name</b> | <b>*Suffix (eg, Jr, III)</b> | Academic Degrees | Institution                                                                                                                                                                                                  | Location (city, state/province, country) | Role or Contribution, eg, chair, principal investigator | Group (if more than 1 Group listed in the byline) and/or Subgroup (eg, Steering Committee) |
|------------------------------------------|-------------------|------------------------------|------------------|--------------------------------------------------------------------------------------------------------------------------------------------------------------------------------------------------------------|------------------------------------------|---------------------------------------------------------|--------------------------------------------------------------------------------------------|
| Amanda Y                                 | Wang              |                              | PhD              | The George Institute for Global Health, UNSW, Sydney, Australia; Department of Renal Medicine, Concord Repatriation General Hospital, Concord Clinical School, University of Sydney, Sydney, UNSW, Australia | Sydney, Australia                        |                                                         | Member, Endpoint Adjudication Committee                                                    |
| Li                                       | Zuo               |                              |                  | Nephrology Dept, Peking University Peoples Hospital                                                                                                                                                          | Beijing, China                           |                                                         | Member, Endpoint Adjudication Committee                                                    |
