# Supplementary material
Source: PubMed Central journal article supplement (PMC9115617)
Supplement: jama-e225368-s004.pdf [file jama-e225368-s004.pdf]

## Data Sharing Statement

### Data

**Data available:** Yes

**Data types:** Deidentified participant data

**How to access data:** Data access can be requested from the first author, Professor Vlado Perkovic or Professor Zhang Hong, via the email: [vlado.perkovic@unsw.edu.au](mailto:vlado.perkovic@unsw.edu.au) or [hongzh@bjmu.edu.cn](mailto:hongzh@bjmu.edu.cn) Once the data access is granted, data can be accessed via a secured environment hosted by The George Institute for Global Health, China, in-line with China's Cyber Security Law.

**When available:** With publication

### Supporting Documents

**Document types:** Statistical/analytic code

**How to access documents:** Reprint of the Statistical analysis plan can be accessed via <https://osf.io/d7qrw/>.

**When available:** With publication

### Additional Information

**Who can access the data:** researchers whose proposed use of the data has been approved by the TESTING trial study group

**Types of analyses:** For any purpose or for a specified purpose approved by the TESTING trial study group

**Mechanisms of data availability:** After approval of a proposal
